# Supplementary material for: An essential pentatricopeptide repeat protein in the apicomplexan remnant chloroplast
Source: PubMed Central journal article supplement (PMC6899631; doi:10.1111/cmi.13108), 2019-09-16
Supplement: CMI-21-na-s004.pdf [file CMI-21-na-s004.pdf]

**1 SUPPLEMENTAL INFORMATION**

1 **Supplemental Table S1. Predicted apicoplast localization.**

| Protein ID    | Species                                        | PlasmoAP Prediction  |          |                                    |          |                            | PlasMit Prediction |        |
|---------------|------------------------------------------------|----------------------|----------|------------------------------------|----------|----------------------------|--------------------|--------|
|               |                                                | Signal Peptide Value | Decision | Apicoplast Targeting Peptide Value | Decision | Targeted to the Apicoplast | Jury               | Strict |
| PF14_0061     | <i>Plasmodium falciparum</i> 3D7               | 3/4                  | +        | 5/5                                | ++       | YES                        | 99% non-mito       | n/a    |
| PFTANZ_05018  | <i>Plasmodium falciparum</i> Tanzania          | 3/4                  | +        | 5/5                                | ++       | YES                        | 99% non-mito       | n/a    |
| PFFVO_04677   | <i>Plasmodium falciparum</i> Vietnam Oak-Knoll | 3/4                  | +        | 5/5                                | ++       | YES                        | 99% non-mito       | n/a    |
| PRCDC_1405700 | <i>Plasmodium reichenowi</i>                   | 2/4                  | 0        | 5/5                                | ++       | NO?                        | 99% non-mito       | n/a    |
| PKH_13050     | <i>Plasmodium knowlesi</i> strain H            | 4/4                  | ++       | 5/5                                | ++       | YES                        | 99% non-mito       | n/a    |
| PVX_086110    | <i>Plasmodium vivax</i> Sal1                   | 3/4                  | +        | 3/5                                | -        | NO?                        | mito 91%           | failed |
| C922_03803    | <i>Plasmodium inui</i> San Antonio I           | 0/4                  | -        | 2/5                                | -        | NO                         | 99% non-mito       | n/a    |
| PYO3222       | <i>Plasmodium yoelii</i> 17XNL                 | 3/4                  | +        | 5/5                                | ++       | YES                        | 99% non-mito       | n/a    |
| PY17X_1038200 | <i>Plasmodium yoelii</i> 17X                   | 3/4                  | +        | 5/5                                | ++       | YES                        | 99% non-mito       | n/a    |
| YYE_02192     | <i>Plasmodium vinckei</i>                      | 4/4                  | ++       | 5/5                                | ++       | YES                        | 99% non-mito       | n/a    |
| PBANKA_103580 | <i>Plasmodium berghei</i> ANKA                 | 4/4                  | ++       | 5/5                                | ++       | YES                        | 99% non-mito       | n/a    |
| PCHAS_103660  | <i>Plasmodium chaubadi</i>                     | 4/4                  | ++       | 5/5                                | ++       | YES                        | 99% non-mito       | n/a    |
| PCYB_135000   | <i>Plasmodium cynmolgi</i> Strain B            | 0/4                  | -        | 0/5                                | -        | NO                         | 99% non-mito       | n/a    |
| PFIT_1407400  | <i>Plasmodium falciparum</i> IT                | 3/4                  | +        | 5/5                                | ++       | YES                        | 99% non-mito       | n/a    |

**Supplemental Table S2. Conditions trialled for detection of PfPPR1 in *P. falciparum* 3D7 lysate by Western Blot**

| <b>Problem</b>                           | <b>Conditions trialled</b>                                                                                                                                                                                                           |
|------------------------------------------|--------------------------------------------------------------------------------------------------------------------------------------------------------------------------------------------------------------------------------------|
| Transfer efficiency                      | iBLOT (dry transfer), wet transfer, temperature of wet transfer. Checked transfer efficiency by staining the membrane with Ponceau and by staining the gel post-transfer with coomassie blue. Wet transfer at room temperature best. |
| Background in western blot images        | Tested preimmune and postimmune serum, background also present in preimmune serum                                                                                                                                                    |
| Blocking solution to decrease background | 1, 2 and 5% (w/v) BSA and 5 and 10% (w/v) non-fat milk powder tested. 10% skim milk powder lowest background.                                                                                                                        |
| Increase specificity                     | Included 0.5 M NaCl in 1xTBS + tween washes. Did not make any difference.                                                                                                                                                            |
| Primary antibody detection               | Purified primary antibody. Compared different dilutions of purified and non-purified primary antibody (1:200, 1:500, 1:1000, 1:2000). Decided upon 1:1000 dilution                                                                   |
| Secondary antibody detection             | Tested for specificity of anti-rabbit AlexaFluor-568 antibody by performing a western blot on purified PPR and plasmodium lysate with no primary antibody. No non-specific binding observed.                                         |

**Supplemental Table S3. Primers used in this study**

| <b>Primer</b>                      | <b>Sequence</b>                                        |
|------------------------------------|--------------------------------------------------------|
| clpC FWD                           | CCTTTATATGGAGCTCGT                                     |
| clpC FWD + T7                      | GCCATAATACGACTCACTATAGCCTTTATATGGAGCTCGT               |
| clpC REV                           | CTGATATTTCTTTTAATTTTATTC                               |
| <i>KDPPR-Fwd</i>                   | GTCTGACAGTCTGTCTCTATGGTGCGCCCGTTGTTCGAGACAAC<br>CTGTC  |
| <i>KDPPR-Rev</i>                   | GGAAAGAGAAGAGAGAAGGACGGCGCATGCTAGCAGATCTGG<br>TTGAAGAC |
| LSU rRNA + T7 FWD                  | GCCATAATACGACTCACTATAG<br>GTGTATAATTCCTAATAAGTTGA      |
| LSU rRNA FWD                       | GTGTATAATTCCTAATAAGTTGA                                |
| LSUrRNA + T7 FWD                   | GCCATAATACGACTCACTATAGGTGTATAATTCCTAATAAGTT<br>GA      |
| LSUrRNA FWD                        | GTGTATAATTCCTAATAAGTTGA                                |
| PF11_0264 minus<br>leader + T7 FWD | GCCATAATACGACTCACTATAGAAGGACACACATATTATTGAT            |
| PF11_0264 minus<br>leader FWD      | AAGGACACACATATTATTGATAAAAAG                            |
| PF11_0264 REV                      | TCAGCTAAAAAAGTAAAGACTATCC                              |
| PF14_0061 minus<br>leader +T7 FWD  | GCCATAATACGACTCACTATAGGACAACCTTTCTGAACG                |
| PF14_0061 minus<br>leader FWD      | GACAACCTTTCTGAACG                                      |
| PF14_0061 REV                      | ATAGTTTTTCGGTTTTCGG                                    |
| PF14_0061_Nterm<br>Fwd             | AAGTTCTGTTTCAGGGCCCGGACAACCTTTCTGAACG                  |
| PF14_0061_Nterm<br>Rev             | ATGGTCTAGAAAGCTTTAATAGTTTTTCGGTTTTCGG                  |
| pGEM FWD                           | TGCAAGGCGATTAAGTTGGGT                                  |
| pGEM REV                           | TGTGGAATTGTGAGCGGATAAC                                 |
| rpl2 REV                           | TCCACCTCCTTTATTATAAATAG                                |
| rpoB REV                           | GAATACATGTTTTATATAATCC                                 |
| rps2 REV                           | TATGAACCAATTATTTTAGGTA                                 |
| tufA + T7 FWD                      | GCCATAATACGACTCACTATAGAATGTACAAAAAGTAGCTATA<br>CCT     |
| tufA FWD                           | AATGTACAAAAAGTAGCTATACCT                               |

A

*Plasmodium*

The sequence name: **5866954**  
Per-protein P-value for being PPR: **2.0E-42**  
Probability for being PPR: **100.00%**

| Repeat | Begin | Alignment                              | End | P-value |
|--------|-------|----------------------------------------|-----|---------|
| PPR    | 167   | -LAFNAAMSAVEKKGCLSTMLDLIGTMKSKNIKPDL-- | 201 | 2.6e-08 |
| PPR    | 202   | -VSYKLVLSLCKYHLVDTAEILFEEMIESDKINPN--  | 236 | 6.3e-09 |
| PPR    | 238   | -EIYAIMISCYAKTNGYKAIELFEKLRNDPFVEEM--  | 272 | 1.5e-09 |
| PPR    | 338   | -SEYANVIYACNISNLYEQGKIKYFEELKSGKYMPS-- | 372 | 4.0e-07 |
| PPR    | 374   | -FVFENIFDILLSKNGDYEKSLLEYNNLKNPNFKKN-- | 408 | 2.5e-06 |
| PPR    | 412   | -NILNLLKALSINHNKINVAEDTWNNEFDELLLTPN-- | 446 | 1.5e-04 |
| PPR    | 448   | -LSYQILLKIYSHIDNYEKAFKLFKEMQVKNLLNKK-- | 482 | 1.0e-09 |
| PPR    | 485   | -LPFIYTIESTKNGIYNYAIYVLRVAKLLNFKAND--  | 519 | 1.0e-02 |
| PPR    | 522   | -MLYNTMISCSNKKYDVIISLYAELINMQQKDTSS--  | 556 | 1.1e-03 |
| PPR    | 562   | -NTLTFVLLAFKELNMKQDFINLKNIIQRNYKLPP--  | 596 | 5.0e-04 |

If you use TPRpred for your research, please cite:

A Completely Reimplemented MPI Bioinformatics Toolkit with a New HHpred Server at its Core.  
Zimmermann L, Stephens A, Nam SZ, Rau D, Kübler J, Lozajic M, Gabler F, Söding J, Lupas AN, Alva V. J Mol Biol. 2018 Jul 20. S0022-2836(17)30587-9.

The sequence name: **Toxoplasma**  
Per-protein P-value for being PPR: **1.3E-19**  
Probability for being PPR: **100.00%**

| Repeat | Begin | Alignment                               | End | P-value |
|--------|-------|-----------------------------------------|-----|---------|
| PPR    | 336   | -AAYNAALHACERQRDRPGALRIYAAMREKEIPIDV--  | 370 | 2.5e-09 |
| PPR    | 371   | -VTLHSLFTLLEAFADDTALLQILAQVDSADPESSM--  | 405 | 3.7e-03 |
| PPR    | 411   | -SPSSSLSPSPRSDSQASPTVSVTPSLLSLGISTCC--  | 445 | 3.0e-01 |
| PPR    | 454   | -VQLMERLKVLLRRNADKFLNFTSVLPPDTADATA--   | 488 | 6.6e-01 |
| PPR    | 496   | -GVYVQLVVALTQEGRYEEALAYYEEELKSLQRRFVE-- | 530 | 5.0e-07 |
| PPR    | 585   | -GAVNAALEACLYTGRLLKQALLIYKEDVEFPEKQRL-- | 619 | 4.3e-03 |
| PPR    | 646   | -RACSQQRQAFALAQIWRDFEELQATVAETQNASPF--  | 680 | 8.4e-02 |
| PPR    | 687   | -PCVASAIQGFACGLWTYALRLLLLLHKETGDARQ--   | 721 | 3.5e-05 |
| PPR    | 726   | -LLSDLLRDAREAAERSGAARETQSKMRSENEGERS--  | 760 | 7.2e-02 |
| PPR    | 792   | -EPYLAVALRACRDVGAWKPALGILRLLQQRHTQAKL-- | 826 | 6.4e-04 |

**B**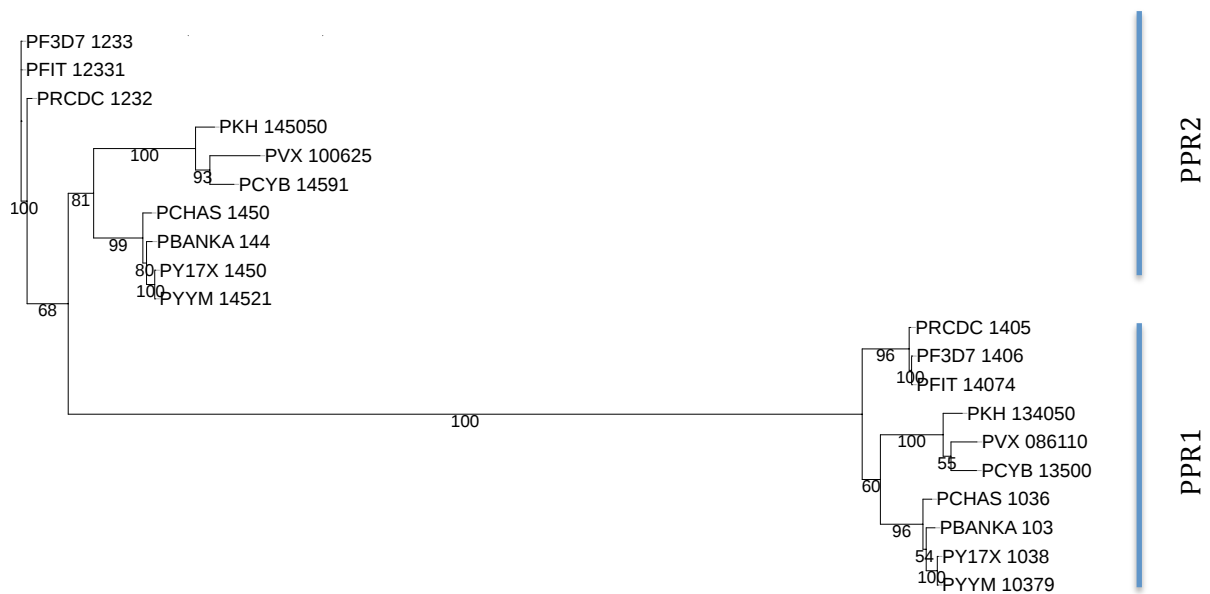

**Supplemental Figure S1.** PPR proteins in *Plasmodium* and *Toxoplasma*. A. PPR predictions for *Plasmodium falciparum* and *Toxoplasma gondii* PPR1. B. PPR1 and PPR2 proteins across the *Plasmodium* species. Mature (i.e. without targeting sequence) PPR1 (apicoplast) and PPR2 (mitochondrial) were aligned across selected *Plasmodium* species using ClustalW, and a phylogenetic tree inferred using PhyML.

Key:

PF3D7: *P. falciparum* 3D7 (PF14\_0061 and PF3D7\_1233300),

PFIT: *P. falciparum* IT (PFIT\_1407400 and [PFIT\\_120038300](#)),

PRCDC: *P. reichenowi*, ([PRCDC\\_1232600](#) and [PRCDC\\_1405700](#)),

PKH: *P. knowlesi* strain H (PKH\_13050 and [PKNH\\_1452800](#)),

PVH: *P. vivax* (PVX\_086110 and [PVX\\_100625](#)),

PCYB: *P. cynmolgi* Strain B (PCYB\_135000 and [PCYB\\_145910](#)),

PBANKA: *P. berghei* ANKA (PBANKA\_103580 and [PBANKA\\_1448000](#)),

PY17X *P. yoelii yoelii* 17X (PY17X\_1038200 and [PY17X\\_1450500](#)),

PYYM: *P. yoelii yoelii* YM (PYYM\_1037900 and [PYYM\\_1452100](#)).

**Supplemental Figure 2.** Alignment of PPR1 proteins from *Plasmodium*, *Toxoplasma* and PPR10 from *Arabidopsis thaliana*. *Plasmodium* species as in Supplemental Figure 1.

|               |                                                                |     |
|---------------|----------------------------------------------------------------|-----|
| AthPPR10      | -----                                                          | 0   |
| Toxoplasma    | HFAFASFEEKAKGSEKCEPAKTPRPTVETADGEPLRRDPADPSSGSGARVCGVHTSGAPLAT | 60  |
| PVX_086110    | -----                                                          | 0   |
| PKH_134050    | -----                                                          | 0   |
| C922_03803    | -----                                                          | 0   |
| PCYB_135000   | -----                                                          | 0   |
| PRCDC_1405700 | -----                                                          | 0   |
| PF3D7_1406400 | -----                                                          | 0   |
| PFFV0_05018   | -----                                                          | 0   |
| PFIT_1407400  | -----                                                          | 0   |
| PFTANZ_05018  | -----                                                          | 0   |
| PCHAS_103660  | -----                                                          | 0   |
| PY17X_1038200 | -----                                                          | 0   |
| PY03222       | -----                                                          | 0   |
| PYYM_1037900  | -----                                                          | 0   |
| PBANKA_103580 | -----                                                          | 0   |
|               |                                                                |     |
| AthPPR10      | -----                                                          | 0   |
| Toxoplasma    | VPKANNESCEGKRHFRFRNTNDEEGNHGNELEGRFEEPEEPEEPDRAAEGQEKRRRENSGK  | 120 |
| PVX_086110    | -----                                                          | 0   |
| PKH_134050    | -----                                                          | 0   |
| C922_03803    | -----                                                          | 0   |
| PCYB_135000   | -----                                                          | 0   |
| PRCDC_1405700 | -----                                                          | 0   |
| PF3D7_1406400 | -----                                                          | 0   |
| PFFV0_05018   | -----                                                          | 0   |
| PFIT_1407400  | -----                                                          | 0   |
| PFTANZ_05018  | -----                                                          | 0   |
| PCHAS_103660  | -----                                                          | 0   |
| PY17X_1038200 | -----                                                          | 0   |
| PY03222       | -----                                                          | 0   |
| PYYM_1037900  | -----                                                          | 0   |
| PBANKA_103580 | -----                                                          | 0   |
|               |                                                                |     |
| AthPPR10      | -----                                                          | 0   |
| Toxoplasma    | TPGRATGKRKSLNGYHASWLASAFNRHQASHIHSLRVSSFRSPLSSFLSSSHSSSLALCS   | 180 |
| PVX_086110    | -----                                                          | 0   |
| PKH_134050    | -----                                                          | 0   |
| C922_03803    | -----                                                          | 0   |
| PCYB_135000   | -----                                                          | 0   |
| PRCDC_1405700 | -----                                                          | 0   |
| PF3D7_1406400 | -----                                                          | 0   |
| PFFV0_05018   | -----                                                          | 0   |
| PFIT_1407400  | -----                                                          | 0   |
| PFTANZ_05018  | -----                                                          | 0   |
| PCHAS_103660  | -----                                                          | 0   |
| PY17X_1038200 | -----                                                          | 0   |
| PY03222       | -----                                                          | 0   |
| PYYM_1037900  | -----                                                          | 0   |
| PBANKA_103580 | -----                                                          | 0   |

|               |                                                            |     |
|---------------|------------------------------------------------------------|-----|
| AthPPR10      | -----ASRRDELLRA                                            | 10  |
| Toxoplasma    | SSFSPFASLLSPSPLFLNPASSASGRRVLSNFLSSPSSSSPSVSASSSSCSSSSLLRA | 240 |
| PVX_086110    | -----                                                      | 0   |
| PKH_134050    | -----                                                      | 0   |
| C922_03803    | -----                                                      | 0   |
| PCYB_135000   | -----                                                      | 0   |
| PRCDC_1405700 | -----                                                      | 0   |
| PF3D7_1406400 | -----                                                      | 0   |
| PFFVO_05018   | -----                                                      | 0   |
| PFIT_1407400  | -----                                                      | 0   |
| PFTANZ_05018  | -----                                                      | 0   |
| PCHAS_103660  | -----                                                      | 0   |
| PY17X_1038200 | -----                                                      | 0   |
| PY03222       | -----                                                      | 0   |
| PYYM_1037900  | -----                                                      | 0   |
| PBANKA_103580 | -----                                                      | 0   |

|               |                                                             |     |
|---------------|-------------------------------------------------------------|-----|
| AthPPR10      | D-----ITSLLKALELSGHWEWALA                                   | 30  |
| Toxoplasma    | LVACHSSPQTASVLSLPPRGSSFSLLSPSVLLRRSETRTQAPTLQAPLLSVRGS----- | 294 |
| PVX_086110    | -----DSPPDGD-----                                           | 7   |
| PKH_134050    | -----AAIHDED-----                                           | 7   |
| C922_03803    | -----TATPDED-----                                           | 7   |
| PCYB_135000   | -----GATPDED-----                                           | 7   |
| PRCDC_1405700 | -----DNFLNEN-----                                           | 7   |
| PF3D7_1406400 | -----DNFLNEN-----                                           | 7   |
| PFFVO_05018   | -----DNFLNEN-----                                           | 7   |
| PFIT_1407400  | -----DNFLNEN-----                                           | 7   |
| PFTANZ_05018  | -----DNFLNEN-----                                           | 7   |
| PCHAS_103660  | -----NQNDDES-----                                           | 6   |
| PY17X_1038200 | -----NKNDEN-----                                            | 6   |
| PY03222       | -----NKNDEN-----                                            | 6   |
| PYYM_1037900  | -----NKNDEN-----                                            | 6   |
| PBANKA_103580 | -----NRNDD-----                                             | 5   |

|               |                                                                   |     |
|---------------|-------------------------------------------------------------------|-----|
| AthPPR10      | LLRWAGKEGAADASALEMVRALGREGQHDVAVCALLDETPLPPGSRLDVRAYTTVLHALS      | 90  |
| Toxoplasma    | ---WPPDAGDDRET---EKRLSPLRI---DYRQAFE---LLENADPTGIKALTAAYNAALHACE  | 346 |
| PVX_086110    | ---ILKKGGAQKEV---EKSVVPLNM---DWVKVMN---LIYAS---RDVDATTLAFNAAMSAVE | 57  |
| PKH_134050    | ---ILKKGGAQKEV---EKSVVPLNM---DWVKVMN---LIYAS---RDVDATTLAFNAAMSAVE | 57  |
| C922_03803    | ---ILKKGGAQKEV---EQSVVPLNM---DWVKVMN---LIYAS---RDVDATTLAFNAAMSAVE | 57  |
| PCYB_135000   | ---ILKKGGAQKEV---EKSVVPLNM---DWVKVMN---LIYAS---RDVDATTLAFNAAMSAVE | 57  |
| PRCDC_1405700 | ---ILKKSSEKEI---EQSLTPLNM---DWVKVMN---LIYSS---NDIDATTLAFNAAMSAVE  | 57  |
| PF3D7_1406400 | ---ILKKSSEKEI---EQSLTPLNM---DWVKVMN---LIYSS---NDIDATTLAFNAAMSAVE  | 57  |
| PFFVO_05018   | ---ILKKSSEKEI---EQSLTPLNM---DWVKVMN---LIYSS---NDIDATTLAFNAAMSAVE  | 57  |
| PFIT_1407400  | ---ILKKSSEKEI---EQSLTPLNM---DWVKVMN---LIYSS---NDIDATTLAFNAAMSAVE  | 57  |
| PFTANZ_05018  | ---ILKKSSEKEI---EQSLTPLNM---DWVKVMN---LIYSS---NDIDATTLAFNAAMSAVE  | 57  |
| PCHAS_103660  | ---ILKKHLEKEI---EQSVIPLNM---DWVKVMN---LISSS---SDVNTTTLAFNAALSAVE  | 56  |
| PY17X_1038200 | ---ILKKHSEKQI---EQSIPLNI---DWIKVMN---LISSS---NDVNTTTLAFNAALSAVE   | 56  |
| PY03222       | ---ILKKHSEKQI---EQSIPLNI---DWIKVMN---LISSS---NDVNTTTLAFNAALSAVE   | 56  |
| PYYM_1037900  | ---ILKKHSEKQI---EQSIPLNI---DWIKVMN---LISSS---NDVNTTTLAFNAALSAVE   | 56  |
| PBANKA_103580 | ---ILKKYSEKEI---EQSIPLNM---DWVKVMN---LISAS---NDVNTTTLAFNAALSAVE   | 55  |

\* : \* : . \* . \* : . : \* .

|               |                                                                |     |
|---------------|----------------------------------------------------------------|-----|
| AthPPR10      | RAGRYERALELFAELRRQGVAPTLVTVYVVDVYGRMGRSWPRIVALLDENR---AAGVEPD  | 149 |
| Toxoplasma    | RQRDRPGALRIYAAMREKEIPIDVVLHSLFTLLEAFADDTA----LLQILAQVDSADPE    | 402 |
| PVX_086110    | KKGCLKSMLEVFIMKKKNIPDLVSYKLLLRLLCANYHLGEHAEI---LFDEMVEDKLTPT   | 116 |
| PKH_134050    | KKGCLKSMLELFEVMKKKNIPDLVSYKLLLRLLCANYHLGDHAEI---LFDEMVEDKLTPT  | 116 |
| C922_03803    | KKGCLKSMLELFEIMKKKNIPDLVSYKLLLRLLCANYHLGEHAEI---LFDEMVEDKLTPT  | 116 |
| PCYB_135000   | KKGCLKSMLELFEIMKKKNIPDLVSYKLLLRLLCANYHLGEHAEI---LFDEMVEDKLTPT  | 116 |
| PRCDC_1405700 | KKGCLTMDLIGTMKSNIKIPDLVSYKLVLSLCDKYHLVDTAEI---LFEEMIESDKINPN   | 116 |
| PF3D7_1406400 | KKGCLSTMDLIGTMKSNIKIPDLVSYKLVLSLCDKYHLVDTAEI---LFEEMIESDKINPN  | 116 |
| PFFVO_05018   | KKGCLSTMDLIGTMKSNIKIPDLVSYKLVLSLCDKYHLVDTAEI---LFEEMIESDKINPN  | 116 |
| PFIT_1407400  | KKGCLSTMDLIGTMKSNIKIPDLVSYKLVLSLCDKYHLVDTAEI---LFEEMIESDKINPN  | 116 |
| PFTANZ_05018  | KKGCLSTMDLIGTMKSNIKIPDLVSYKLVLSLCDKYHLVDTAEI---LFEEMIESDKINPN  | 116 |
| PCHAS_103660  | KKGCLTSIIELFEIMKKKNIPDLISYKLIILTLCDKYHLAEYAEI---LFDEMTESDNIRPN | 115 |
| PY17X_1038200 | KKGCLTSIIELFEIMKKKNIPDLISYKLIILSLCDKYHLAEYAEI---LFDEMVEDSNIRPS | 115 |
| PY03222       | KKGCLTSIIELFEIMKKKNIPDLISYKLIILSLCDKYHLAEYAEI---LFDEMVEDSNIRPS | 115 |
| PYYM_1037900  | KKGCLTSIIELFEIMKKKNIPDLISYKLIILSLCDKYHLAEYAEI---LFDEMVEDSNIRPS | 115 |
| PBANKA_103580 | KKRCLTSIIELFEIMKKKNIPDLISYKLIILTLCDKYHLADYAEI---LFNEMVEDSNIRPN | 114 |

: : : : : : : : : : \* : : \*



|               |                                                              |     |
|---------------|--------------------------------------------------------------|-----|
| AthPPR10      | -----GFTASTVIAACCRDGLVDEAVAFFEDLKA                           | 178 |
| Toxoplasma    | SSMAFLSRSPSSSLSPSPRSDSQASPTVSVTPSLLSLGISTCCRAGNATAAVQLMERLKV | 462 |
| PVX_086110    | -----YEIYALMISCFKAVGDGHRVAFVFEKLS                            | 145 |
| PKH_134050    | -----YEIYALMISCFKAVGDGHRVAFVFEKLS                            | 145 |
| C922_03803    | -----YEIYALMISCFKAVGDGHRVAFVFEKLS                            | 145 |
| PCYB_135000   | -----YEIYALMISCFKAVGDGHRVAFVFEKLS                            | 145 |
| PRCDC_1405700 | -----YEIYAIMISCYAKTGNGYKAIELFEKLRN                           | 145 |
| PF3D7_1406400 | -----YEIYAIMISCYAKTGNGYKAIELFEKLRN                           | 145 |
| PPFV0_05018   | -----YEIYAIMISCYAKTGNGYKAIELFEKLRN                           | 145 |
| PFIT_1407400  | -----YEIYAIMISCYAKTGNGYKAIELFEKLRN                           | 145 |
| PFTANZ_05018  | -----YEIYAIMISCYAKTGNGYKAIELFEKLRN                           | 145 |
| PCHAS_103660  | -----YEIYSIMISCFSKVGDGHRVAFVFEKLS                            | 144 |
| PY17X_1038200 | -----YEIYSIMISCFSKVGDGHRVAFVFEKLS                            | 144 |
| PY03222       | -----YEIYSIMISCFSKVGDGHRVAFVFEKLS                            | 144 |
| PYYM_1037900  | -----YEIYSIMISCFSKVGDGHRVAFVFEKLS                            | 144 |
| PBANKA_103580 | -----YEIYSIMISCFSKVGDGHRVAFVFEKLS                            | 143 |

: \* .: \* \* :.\* \*:

|               |                                                           |     |
|---------------|-----------------------------------------------------------|-----|
| AthPPR10      | RG---HAPCVVVTYNALLQVFGKAGNYTEALRV---LGEMEQNG-----         | 215 |
| Toxoplasma    | LLRRNADKFLNFTSVLPDPTADA-----                              | 486 |
| PVX_086110    | D-----PLVGEVNNWG-EAGG-----VSGSGSADD-----                  | 169 |
| PKH_134050    | D-----PLVEGVNNEVDGSGDNGSAGRNVSNVSDGNVSDGNVSDGNVNRGE       | 199 |
| C922_03803    | D-----PLVEEVNNGW-DRSGD-----TADRGTAD-----RGD               | 173 |
| PCYB_135000   | D-----PLVEEVNNGWGDSSGVGDSSGG-----GDSSGGDRSGAGDSSGDG---DGS | 190 |
| PRCDC_1405700 | D-----PLVEEMRSLNITNTNDN-----KENSNDLET-----                | 172 |
| PF3D7_1406400 | D-----PFVEEMRSLNITNTNDN-----KENSNDLQT-----                | 172 |
| PPFV0_05018   | D-----PFVEEMRSLNITNTNDN-----KENSNDLQT-----                | 172 |
| PFIT_1407400  | D-----PFVEEMRSLNITNTNDN-----KENSNDLQT-----                | 172 |
| PFTANZ_05018  | D-----PFVEEMRSLNITNTNDN-----KENSNDLQT-----                | 172 |
| PCHAS_103660  | D-----PFVENFKEL---TSKYD-----KEKSNRWED-----                | 168 |
| PY17X_1038200 | D-----PFVENIKEL---DSKYD-----KEKSNRWEN-----                | 168 |
| PY03222       | D-----PFVENIKEL---DSKYD-----KEKSNRWEN-----                | 168 |
| PYYM_1037900  | D-----PFVENIKEL---DSKYD-----KEKSNRWEN-----                | 168 |
| PBANKA_103580 | D-----PFVENIKEL---NSKYD-----KEKSNRWEN-----                | 167 |

:

|               |                                                               |     |
|---------------|---------------------------------------------------------------|-----|
| AthPPR10      | -----CQPDVAVTYNELAGTYA-----                                   | 231 |
| Toxoplasma    | -----                                                         | 486 |
| PVX_086110    | RQHPAWRDSFAEEATTEEGAEAGSTYTNQFKEITKKIKHIERGSS-KIQYSEYANVIFA   | 228 |
| PKH_134050    | RGNYLWKDHFDEQAATEEDAEGNAYTNQFKDITKKIKHIEKGS-KIQYSEYTNVIFA     | 258 |
| C922_03803    | GGNPAWKDAFAEEAPTEEGAKAEGKYTNQFKEITKKIKQIEKGS-KIQYSEYTNVIFA    | 232 |
| PCYB_135000   | GENRVKDAFAEEAATEEGAKEEGNYTNQFKEITKKIKHIEKGS-KIQFSEYTNVIFA     | 249 |
| PRCDC_1405700 | --SIIHNNIEDNNNN-NNNN---NNIYDDKFKHISNKIKNVENYSG-KIQYSEYANVIYA  | 225 |
| PF3D7_1406400 | --SIIHNNMEDNNNN-NNNN---DNNIYDDKFKHISNKIKNVENCSG-KIQYSEYANVIYA | 226 |
| PPFV0_05018   | --SIIHNNMEDNNNN-NNNNNDNNIYDDKFKHISNKIKNVENCSG-KIQYSEYANVIYA   | 228 |
| PFIT_1407400  | --SIIHNNMEDNNNN-NNNNNDNNIYDDKFKHISNKIKNVENCSG-KIQYSEYANVIYA   | 228 |
| PFTANZ_05018  | --SIIHNNMEDNNNN-NNNNNDNNIYDDKFKHISNKIKNVENCSG-KIQYSEYANVIYA   | 227 |
| PCHAS_103660  | --TFAQVNS-----NNGEDNTPNYNAQFKELTEKIKNVENNNN-KIQYSEYANVIFA     | 218 |
| PY17X_1038200 | --TFAQVNSKNDDNKINNGEDDSPNYNTQFKELTEKIKNVENNNN-KIQYSEYANVIFA   | 226 |
| PY03222       | --TFAQVNSKNDDNKINNGEDDSPNYNTQFKELTEKIKNVENNNN-KIQYSEYANVIFA   | 226 |
| PYYM_1037900  | --TFAQVNSKNDDNKINNGEDDSPNYNTQFKELTEKIKNVENNNN-KIQYSEYANVIFA   | 226 |
| PBANKA_103580 | --TFAQVNSKSEDNKINHGEDDSPNYNTQFKELTEKIKNVENNN---KIQYSEYANVIFA  | 223 |

|               |                                                              |     |
|---------------|--------------------------------------------------------------|-----|
| AthPPR10      | --RAGFFEEAARCLD-TMASKGLLPNAFTYNTVMTAYGNVGVDEALALFDQMKTGFVP   | 288 |
| Toxoplasma    | -----TAAVAHPPTGVYVQLVVALTQEGRYEEALAYYEEELKSLQRRF             | 528 |
| PVX_086110    | CNMSNLPEQGIKYFEELLNTGKYMPSLTLLESIFDLLAKNGNYEKCLDYNNKLDKDPNFK | 288 |
| PKH_134050    | CNMSNLPEQGIKYFEELLNTGKYMPSLTLLESIFDLLAKNGNYEKCLDYNNKLDKDPNFK | 318 |
| C922_03803    | CNMSNLPEQGIKYFEELLNTGKYMPSLTLLESIFDLLAKNGNYEKCLDYNNKLDKDPNFK | 292 |
| PCYB_135000   | CNMSNLPEQGIKYFEELLNTGKYMPSLTLLESIFDLLAKNGNYEKSLDYNNKLDKDPNFK | 309 |
| PRCDC_1405700 | CNISNLYEQGIKYFEELLKSGKYMPSIFVFENIFDLLSKNGDYEKSLDYNNKLDKDPNFK | 285 |
| PF3D7_1406400 | CNISNLYEQGIKYFEELLKSGKYMPSIFVFENIFDLLSKNGDYEKSLDYNNKLDKDPNFK | 286 |
| PPFV0_05018   | CNISNLYEQGIKYFEELLKSGKYMPSIFVFENIFDLLSKNGDYEKSLDYNNKLDKDPNFK | 288 |
| PFIT_1407400  | CNISNLYEQGIKYFEELLKSGKYMPSIFVFENIFDLLSKNGDYEKSLDYNNKLDKDPNFK | 288 |
| PFTANZ_05018  | CNISNLYEQGIKYFEELLKSGKYMPSIFVFENIFDLLSKNGDYEKSLDYNNKLDKDPNFK | 287 |
| PCHAS_103660  | CNISNLYEQGIKYFEELLNSTKYIPSTFIFENIFDLLGKNGNYEKALDYNNKLDKDPNFK | 278 |
| PY17X_1038200 | CNMSNLHEHGIKYFEELLNSTKYIPSTFIFENIFDLLGKNGNYEKALDYNNKLDKDPNFK | 286 |
| PY03222       | CNMSNLHEHGIKYFEELLNSTKYIPSTFIFENIFDLLGKNGNYEKALDYNNKLDKDPNFK | 286 |
| PYYM_1037900  | CNMSNLHEHGIKYFEELLNSTKYIPSTFIFENIFDLLGKNGNYEKALDYNNKLDKDPNFK | 286 |
| PBANKA_103580 | CNISNLYEQGIKYFEELLNSTKYIPSTFIFENIFDLLGKNGNYEKALDYNNKLDKDPNFK | 283 |

: \* :. : \* :.\* :.\*:

|               |                                                         |     |
|---------------|---------------------------------------------------------|-----|
| AthPPR10      | NVNTYNLVLGMLGKKSFR-----TVMLEMLGEMSRSGCTPNRVTWNTMLAVCGKR | 338 |
| Toxoplasma    | VEK-QLLEREVARRAELVERELKNAPEQERKLLGDIERQV-----           | 569 |
| PVX_086110    | -KA-I-----                                              | 291 |
| PKH_134050    | -KY-I-----                                              | 321 |
| C922_03803    | -KY-I-----                                              | 295 |
| PCYB_135000   | -KY-I-----                                              | 312 |
| PRCDC_1405700 | -KN-I-----                                              | 288 |
| PF3D7_1406400 | -KN-I-----                                              | 289 |
| PPFV0_05018   | -KN-I-----                                              | 291 |
| PFIT_1407400  | -KN-I-----                                              | 291 |
| PFTANZ_05018  | -KN-I-----                                              | 290 |
| PCHAS_103660  | -KY-I-----                                              | 281 |
| PY17X_1038200 | -KY-I-----                                              | 289 |
| PY03222       | -KY-I-----                                              | 289 |
| PYYM_1037900  | -KY-I-----                                              | 289 |
| PBANKA_103580 | -KY-I-----                                              | 286 |

|               |                                                            |     |
|---------------|------------------------------------------------------------|-----|
| AthPPR10      | GMEDYVTRVLEGMRSCGVLSRDYNTLIAAYGRCGSRTNAFKMYNEMTSAGFTPCITTY | 398 |
| Toxoplasma    | -----VEEQELLEDYQPPIGAV                                     | 587 |
| PVX_086110    | -----NVNIL                                                 | 296 |
| PKH_134050    | -----NVNIL                                                 | 326 |
| C922_03803    | -----NVNIL                                                 | 300 |
| PCYB_135000   | -----NVNIL                                                 | 317 |
| PRCDC_1405700 | -----NVNIL                                                 | 293 |
| PF3D7_1406400 | -----NVNIL                                                 | 294 |
| PPFV0_05018   | -----NVNIL                                                 | 296 |
| PFIT_1407400  | -----NVNIL                                                 | 296 |
| PFTANZ_05018  | -----NVNIL                                                 | 295 |
| PCHAS_103660  | -----NVNIL                                                 | 286 |
| PY17X_1038200 | -----NVNIL                                                 | 294 |
| PY03222       | -----NVNIL                                                 | 294 |
| PYYM_1037900  | -----NVNIL                                                 | 294 |
| PBANKA_103580 | -----NVNIL                                                 | 291 |

:

|               |                                                              |     |
|---------------|--------------------------------------------------------------|-----|
| AthPPR10      | NALLNVLSRQGDWSTAQSIVSKMRTKGFKPNEQSYSLLLQCYAKGGNVAGIAAIENEVYG | 458 |
| Toxoplasma    | NAALEACLYTGRLKQALLIYK-----                                   | 608 |
| PVX_086110    | NNILKALSVQGKINIIEDLWK-----                                   | 317 |
| PKH_134050    | NNILKALCVHGKINIEQVWK-----                                    | 347 |
| C922_03803    | NNILKALSVHAKSNIEQVWK-----                                    | 321 |
| PCYB_135000   | NNILKALTVHGKINIEQVWK-----                                    | 338 |
| PRCDC_1405700 | NNLLKTLSTIHNKINVAEDIWN-----                                  | 314 |
| PF3D7_1406400 | NNLLKALSTIHNKINVAEDIWN-----                                  | 315 |
| PPFV0_05018   | NNLLKALSTIHNKINVAEDIWN-----                                  | 317 |
| PFIT_1407400  | NNLLKALSTIHNKINVAEDIWN-----                                  | 317 |
| PFTANZ_05018  | NNLLKALSTIHNKINVAEDIWN-----                                  | 316 |
| PCHAS_103660  | NNLLKSLSLSNKINIENIWN-----                                    | 307 |
| PY17X_1038200 | NNILKSLSLSNKINIENIWN-----                                    | 315 |
| PY03222       | NNILKSLSLSNKINIENIWN-----                                    | 315 |
| PYYM_1037900  | NNILKSLSLSNKINIENIWN-----                                    | 315 |
| PBANKA_103580 | NNILKSLSLSNKINIENIWN-----                                    | 312 |

\* \*: . : .

|               |                                                              |     |
|---------------|--------------------------------------------------------------|-----|
| AthPPR10      | SGAVFPSWVILRTLVIANFKCRRLDGMETAFQEVKARGYNPDLVIFNSMLSIYAKNGMYS | 518 |
| Toxoplasma    | EDVEFPEKQRL-----R                                            | 620 |
| PVX_086110    | N-----                                                       | 318 |
| PKH_134050    | N-----                                                       | 348 |
| C922_03803    | N-----                                                       | 322 |
| PCYB_135000   | N-----                                                       | 339 |
| PRCDC_1405700 | N-----                                                       | 315 |
| PF3D7_1406400 | N-----                                                       | 316 |
| PPFV0_05018   | N-----                                                       | 318 |
| PFIT_1407400  | N-----                                                       | 318 |
| PFTANZ_05018  | N-----                                                       | 317 |
| PCHAS_103660  | N-----                                                       | 308 |
| PY17X_1038200 | N-----                                                       | 316 |
| PY03222       | N-----                                                       | 316 |
| PYYM_1037900  | N-----                                                       | 316 |
| PBANKA_103580 | N-----                                                       | 313 |

.

|               |                                                              |                          |     |
|---------------|--------------------------------------------------------------|--------------------------|-----|
| AthPPR10      | KATEVFDISIKRSGSLPDILITYNSLMDMYAKCSSEWEAEKILNQLKCSQTMK----    | PDVVS                    | 574 |
| Toxoplasma    | AGEALDQDLAPSKAAPTLRTFELLRACSSQQRQAFALAQIWRDFEELQAT-VAETQNASP |                          | 679 |
| PVX_086110    | -----EFDELMLTPNEISYGYMLKVYSIVDD---                           | YEKAFKLFKEMQMKKMLSNKNIIP | 368 |
| PKH_134050    | -----EFDELMLTPNAISYAYMLNAYSIVDD---                           | YEKAFKLFKEMQMKKMLNKNKIIP | 398 |
| C922_03803    | -----EFDDLMLTPNAISYAYMLNVYSIMDD---                           | YEKAFKLFKEMQMKKMLNKNKIIP | 372 |
| PCYB_135000   | -----EFDDLMLTPNAISYGFMLNAYSIVDD---                           | YEKAFKLFKEMHMKMLNKNKIIP  | 389 |
| PRCDC_1405700 | -----EFDELLLTNNLSYQILLKIYSHIDN---                            | YEKAFKLFKEMQINKMLNKNKIIP | 365 |
| PF3D7_1406400 | -----EFDELLLTNNLSYQILLKIYSHIDN---                            | YEKAFKLFKEMQVKNMLNKNKIIP | 366 |
| PPFV0_05018   | -----EFDELLLTNNLSYQILLKIYSHIDN---                            | YEKAFKLFKEMQVKNMLNKNKIIP | 368 |
| PFIT_1407400  | -----EFDELLLTNNLSYQILLKIYSHIDN---                            | YEKAFKLFKEMQVKNMLNKNKIIP | 368 |
| PFTANZ_05018  | -----EFDELLLTNNLSYQILLKIYSHIDN---                            | YEKAFKLFKEMQVKNMLNKNKIIP | 367 |
| PCHAS_103660  | -----EYDELLLTNHSVSYQIMLVNYSNIDD---                           | YEKAFKLFKEMQIKKMLNKNKIIP | 358 |
| PY17X_1038200 | -----EYDELLLVQNSVSYQIMLVNYSNIDD---                           | YEKAFKLFKEMQMKKMLNKNKIIP | 366 |
| PY03222       | -----EYDELLLVQNSVSYQIMLVNYSNIDD---                           | YEKAFKLFKEMQMKKMLNKNKIIP | 366 |
| PYYM_1037900  | -----EYDELLLVQNSVSYQIMLVNYSNIDD---                           | YEKAFKLFKEMQMKKMLNKNKIIP | 366 |
| PBANKA_103580 | -----EYDELLLTQNSVSYQIMLVNYSNIDD---                           | YKSFKLFKEMQMKKMLNKNKIIP  | 363 |

. : : : . : : : . : : :

|               |                                                            |                |     |
|---------------|------------------------------------------------------------|----------------|-----|
| AthPPR10      | Y-----NTVINGFCKQGLVKEAQRVLS-----                           | EMVADGMAPCA    | 607 |
| Toxoplasma    | FRLPSAAPCVASAIQGFACGLWYALRLLLLLHKETGDARQRHCELLSDLLRDAREAAE |                | 739 |
| PVX_086110    | -----VYTINAFKNCGIYNYAIYVLRVAKLLGV-SSED---                  | LLKLYNDAMVACV  | 414 |
| PKH_134050    | F-----VYTIHAFKNCGIYNYAIYVLRVAKLLNV-SSED---                 | LLKLYNDAMVACI  | 444 |
| C922_03803    | F-----VYTINAFKNCGIYNYAIYVLRVAKLLNV-SSED---                 | LLKLYNDAMIACI  | 418 |
| PCYB_135000   | F-----VYTINAFKNCGIYNYAIYVLRVAKLLDV-FSED---                 | LLKLYNNAMIACV  | 435 |
| PRCDC_1405700 | F-----IYTIESTKNCGIYNYAIYVLRVAKLLNF-KAND---                 | LLMLYNNMTMISCI | 411 |
| PF3D7_1406400 | F-----IYTIESTKNCGIYNYAIYVLRVAKLLNF-KAND---                 | LLMLYNNMTMISCI | 412 |
| PPFV0_05018   | F-----IYTIESTKNCGIYNYAIYVLRVAKLLNF-KAND---                 | LLMLYNNMTMISCI | 414 |
| PFIT_1407400  | F-----IYTIESTKNCGIYNYAIYVLRVAKLLNF-KAND---                 | LLMLYNNMTMISCI | 414 |
| PFTANZ_05018  | F-----IYTIESTKNCGIYNYAIYVLRVAKLLNF-KAND---                 | LLMLYNNMTMISCI | 413 |
| PCHAS_103660  | F-----VYVLNSFKNCGIYNSIYVLRVAKLLIGI-VGKD---                 | LLFLYNNAMITCV  | 404 |
| PY17X_1038200 | F-----VYTIINSFKNCGIYNSIYVLRVAKLLIGI-VGKD---                | LLFLYNNAMISCI  | 412 |
| PY03222       | F-----VYTIINSFKNCGIYNSIYVLRVAKLLIGI-VGKD---                | LLFLYNNAMISCI  | 412 |
| PYYM_1037900  | F-----VYTIINSFKNCGIYNSIYVLRVAKLLIGI-VGKD---                | LLFLYNNAMISCI  | 412 |
| PBANKA_103580 | F-----VYTIINSFKNCGIYNSIYVLRVAKLLIGI-VGKN---                | LLFLYNNAMIACI  | 409 |

: . . . \* : . : \* : : :

|               |                                                              |               |     |
|---------------|--------------------------------------------------------------|---------------|-----|
| AthPPR10      | V-----                                                       | TYHTLVG       | 615 |
| Toxoplasma    | RSGAARETQSKMRSENEGERSEEQKDGDARAAASESGDWERCLEGRFVDLGVPEYLAVLR |               | 799 |
| PVX_086110    | NAK---KYDVVI--SLYAELITMQEKGAPS-----                          | LEISISTLGFVLL | 452 |
| PKH_134050    | NSK---KYEVVI--SLYAELVTMQEKGAPS-----                          | LEINISTLGFVLL | 482 |
| C922_03803    | SCK---KYDVVI--SLYAELITMQEKGAPS-----                          | LEINISTLGFVLL | 456 |
| PCYB_135000   | NCK---KYDVVI--SLYAELITMQEKGAPS-----                          | LEINISTLGFVLL | 473 |
| PRCDC_1405700 | NSK---KYDVII--SLYAELINMQK-DTS-----                           | FQININTLTFVLL | 448 |
| PF3D7_1406400 | NSK---KYDVII--SLYAELINMQK-DTS-----                           | FQININTLTFVLL | 449 |
| PPFV0_05018   | NSK---KYDVII--SLYAELINMQK-DTS-----                           | FQININTLTFVLL | 451 |
| PFIT_1407400  | NSK---KYDVII--SLYAELINMQK-DTS-----                           | FQININTLTFVLL | 451 |
| PFTANZ_05018  | NSK---KYDVII--SLYAELINMQK-DTS-----                           | FQININTLTFVLL | 450 |
| PCHAS_103660  | NAK---KYDVII--SLYTELIALQEK-DTS-----                          | LTININTLSFVLL | 441 |
| PY17X_1038200 | NAK---KYDVII--SLYTELIALQEK-DTS-----                          | LTININTLSFVLL | 449 |
| PY03222       | NAK---KYDVII--SLYTELIALQEK-DTS-----                          | LTININTLSFVLL | 449 |
| PYYM_1037900  | NAK---KYDVII--SLYTELIALQEK-DTS-----                          | LTININTLSFVLL | 449 |
| PBANKA_103580 | NAK---KYDVII--SLYTELIALQEK-DTS-----                          | LIININTLSFVLL | 446 |

::

|               |                                                               |        |     |
|---------------|---------------------------------------------------------------|--------|-----|
| AthPPR10      | GYSSLEMFSEAREVIGYMVQHGLKPMELTYRRVV-----                       | ESYCRA | 655 |
| Toxoplasma    | ACRDVGAWKPALGILRLLQQRHTQAKLLHALGAARERREAERREQFQQRVLRALRRRLSEA |        | 859 |
| PVX_086110    | AFRELDMREDFTNLKNLIIQKNYKLTPL-----                             |        | 480 |
| PKH_134050    | AFKELNMRDDFINLKNLIIQKNYKLTPL-----                             |        | 510 |
| C922_03803    | AFKELNMRDDFINLKNLIIQKNYKLTPL-----                             |        | 484 |
| PCYB_135000   | AFKELNMRDDFINLKNLIIQKNYKLTPL-----                             |        | 501 |
| PRCDC_1405700 | AFKELNMKQDFINLKNIIQRNYKLPPL-----                              |        | 476 |
| PF3D7_1406400 | AFKELNMKQDFINLKNIIQRNYKLPPL-----                              |        | 477 |
| PPFV0_05018   | AFKELNMKQDFINLKNIIQRNYKLPPL-----                              |        | 479 |
| PFIT_1407400  | AFKELNMKQDFINLKNIIQRNYKLPPL-----                              |        | 479 |
| PFTANZ_05018  | AFKELNMKQDFINLKNIIQRNYKLPPL-----                              |        | 478 |
| PCHAS_103660  | AFKELKMKEDFSNLKNLILQKNYKLTPL-----                             |        | 469 |
| PY17X_1038200 | AFKELKMKEDFLNLKNIIILQKNYKLTPL-----                            |        | 477 |
| PY03222       | AFKELKMKEDFLNLKNIIILQKNYKLTPL-----                            |        | 477 |
| PYYM_1037900  | AFKELKMKEDFLNLKNIIILQKNYKLTPL-----                            |        | 477 |
| PBANKA_103580 | AFKELKMKEDFSNLKNLILQKNYKLTPL-----                             |        | 474 |

. : . : : \* : : \*

|               |                                                             |     |
|---------------|-------------------------------------------------------------|-----|
| AthPPR10      | KRFEEARGFLSEVSETDL-----FDKKALEAYIE----DAQFR-----            | 691 |
| Toxoplasma    | KRKTNGADCVGEAAEQRPTSASPTGDSDDLRSRDMERFLGSLHNSVAVGRTPLLPEFPY | 919 |
| PVX_086110    | -----CGQLVSEQPH-----                                        | 490 |
| PKH_134050    | -----CGKLVNEQQND-----                                       | 521 |
| C922_03803    | -----CGKLVNEEPEW-----                                       | 495 |
| PCYB_135000   | -----CAKLVSEESDS-----                                       | 512 |
| PRCDC_1405700 | -----CSKIFSETENY*-----                                      | 487 |
| PF3D7_1406400 | -----CSKIFSETENY-----                                       | 488 |
| PFFV0_05018   | -----CSKIFSETENY-----                                       | 490 |
| PFIT_1407400  | -----CSKIFSETENY*-----                                      | 490 |
| PFTANZ_05018  | -----CSKIFSETENY-----                                       | 489 |
| PCHAS_103660  | -----CSKIINEPEDQ*-----                                      | 480 |
| PY17X_1038200 | -----CSKVINEQES*-----                                       | 487 |
| PY03222       | -----CSKVINEQES-----                                        | 487 |
| PYYM_1037900  | -----CSKVINEQES-----                                        | 487 |
| PBANKA_103580 | -----CSKVINEP-----                                          | 482 |

\*

|               |                                                              |     |
|---------------|--------------------------------------------------------------|-----|
| AthPPR10      | -----                                                        | 691 |
| Toxoplasma    | EAYALTLGTMAAARAWDRVLAVSSEFFSRRDSGACGSASLGADGPAGEANEERKPARRAV | 979 |
| PVX_086110    | -----                                                        | 490 |
| PKH_134050    | -----                                                        | 521 |
| C922_03803    | -----                                                        | 495 |
| PCYB_135000   | -----                                                        | 512 |
| PRCDC_1405700 | -----                                                        | 487 |
| PF3D7_1406400 | -----                                                        | 488 |
| PFFV0_05018   | -----                                                        | 490 |
| PFIT_1407400  | -----                                                        | 490 |
| PFTANZ_05018  | -----                                                        | 489 |
| PCHAS_103660  | -----                                                        | 480 |
| PY17X_1038200 | -----                                                        | 487 |
| PY03222       | -----                                                        | 487 |
| PYYM_1037900  | -----                                                        | 487 |
| PBANKA_103580 | -----                                                        | 482 |

|               |                                                              |      |
|---------------|--------------------------------------------------------------|------|
| AthPPR10      | -----                                                        | 691  |
| Toxoplasma    | GFGGERDEGGQPERGAEGERRDAPLEIRKSVHAYRLMALMHLGRHEEVEAERRSLIRLTE | 1039 |
| PVX_086110    | -----                                                        | 490  |
| PKH_134050    | -----                                                        | 521  |
| C922_03803    | -----                                                        | 495  |
| PCYB_135000   | -----                                                        | 512  |
| PRCDC_1405700 | -----                                                        | 487  |
| PF3D7_1406400 | -----                                                        | 488  |
| PFFV0_05018   | -----                                                        | 490  |
| PFIT_1407400  | -----                                                        | 490  |
| PFTANZ_05018  | -----                                                        | 489  |
| PCHAS_103660  | -----                                                        | 480  |
| PY17X_1038200 | -----                                                        | 487  |
| PY03222       | -----                                                        | 487  |
| PYYM_1037900  | -----                                                        | 487  |
| PBANKA_103580 | -----                                                        | 482  |

|               |                                                              |      |
|---------------|--------------------------------------------------------------|------|
| AthPPR10      | -----                                                        | 691  |
| Toxoplasma    | MERRTRERRDARQREREGGEEKREEGEGSEEAFLPKWREETEHEEGEGGEDEGSHGIATL | 1099 |
| PVX_086110    | -----                                                        | 490  |
| PKH_134050    | -----                                                        | 521  |
| C922_03803    | -----                                                        | 495  |
| PCYB_135000   | -----                                                        | 512  |
| PRCDC_1405700 | -----                                                        | 487  |
| PF3D7_1406400 | -----                                                        | 488  |
| PFFV0_05018   | -----                                                        | 490  |
| PFIT_1407400  | -----                                                        | 490  |
| PFTANZ_05018  | -----                                                        | 489  |
| PCHAS_103660  | -----                                                        | 480  |
| PY17X_1038200 | -----                                                        | 487  |
| PY03222       | -----                                                        | 487  |
| PYYM_1037900  | -----                                                        | 487  |
| PBANKA_103580 | -----                                                        | 482  |

|               |                                                              |      |
|---------------|--------------------------------------------------------------|------|
| AthPPR10      | -----                                                        | 691  |
| Toxoplasma    | VLEEAETWLMRGVTRERRTQGKDNIYPTPSIHETTPTHYEATHHSFPSPSKSSSASSSAS | 1159 |
| PVX_086110    | -----                                                        | 490  |
| PKH_134050    | -----                                                        | 521  |
| C922_03803    | -----                                                        | 495  |
| PCYB_135000   | -----                                                        | 512  |
| PRCDC_1405700 | -----                                                        | 487  |
| PF3D7_1406400 | -----                                                        | 488  |
| PFFV0_05018   | -----                                                        | 490  |
| PFIT_1407400  | -----                                                        | 490  |
| PFTANZ_05018  | -----                                                        | 489  |
| PCHAS_103660  | -----                                                        | 480  |
| PY17X_1038200 | -----                                                        | 487  |
| PY03222       | -----                                                        | 487  |
| PYYM_1037900  | -----                                                        | 487  |
| PBANKA_103580 | -----                                                        | 482  |

|               |                                                              |      |
|---------------|--------------------------------------------------------------|------|
| AthPPR10      | -----                                                        | 691  |
| Toxoplasma    | SSASSSASSSASSSSSFSSASSSSFSSSPLQPSFIAGSGGGRSMLRDVRHLEGVSAMSEG | 1219 |
| PVX_086110    | -----                                                        | 490  |
| PKH_134050    | -----                                                        | 521  |
| C922_03803    | -----                                                        | 495  |
| PCYB_135000   | -----                                                        | 512  |
| PRCDC_1405700 | -----                                                        | 487  |
| PF3D7_1406400 | -----                                                        | 488  |
| PFFV0_05018   | -----                                                        | 490  |
| PFIT_1407400  | -----                                                        | 490  |
| PFTANZ_05018  | -----                                                        | 489  |
| PCHAS_103660  | -----                                                        | 480  |
| PY17X_1038200 | -----                                                        | 487  |
| PY03222       | -----                                                        | 487  |
| PYYM_1037900  | -----                                                        | 487  |
| PBANKA_103580 | -----                                                        | 482  |

|               |                                                              |      |
|---------------|--------------------------------------------------------------|------|
| AthPPR10      | -----                                                        | 691  |
| Toxoplasma    | LKEGRGEETSARRAEFLIGGGTKRKVCVQEEDRGDAVAEAGEANHKSVCREDTGEHHSGR | 1279 |
| PVX_086110    | -----                                                        | 490  |
| PKH_134050    | -----                                                        | 521  |
| C922_03803    | -----                                                        | 495  |
| PCYB_135000   | -----                                                        | 512  |
| PRCDC_1405700 | -----                                                        | 487  |
| PF3D7_1406400 | -----                                                        | 488  |
| PFFV0_05018   | -----                                                        | 490  |
| PFIT_1407400  | -----                                                        | 490  |
| PFTANZ_05018  | -----                                                        | 489  |
| PCHAS_103660  | -----                                                        | 480  |
| PY17X_1038200 | -----                                                        | 487  |
| PY03222       | -----                                                        | 487  |
| PYYM_1037900  | -----                                                        | 487  |
| PBANKA_103580 | -----                                                        | 482  |

|               |                                                              |      |
|---------------|--------------------------------------------------------------|------|
| AthPPR10      | -----                                                        | 691  |
| Toxoplasma    | SLDRFFAGLEPVSEREARAVAEAVERRRTEEHWRQEKMQSGVKRATGDREGMQPKRSADP | 1339 |
| PVX_086110    | -----                                                        | 490  |
| PKH_134050    | -----                                                        | 521  |
| C922_03803    | -----                                                        | 495  |
| PCYB_135000   | -----                                                        | 512  |
| PRCDC_1405700 | -----                                                        | 487  |
| PF3D7_1406400 | -----                                                        | 488  |
| PFFV0_05018   | -----                                                        | 490  |
| PFIT_1407400  | -----                                                        | 490  |
| PFTANZ_05018  | -----                                                        | 489  |
| PCHAS_103660  | -----                                                        | 480  |
| PY17X_1038200 | -----                                                        | 487  |
| PY03222       | -----                                                        | 487  |
| PYYM_1037900  | -----                                                        | 487  |
| PBANKA_103580 | -----                                                        | 482  |

|               |                                                              |      |
|---------------|--------------------------------------------------------------|------|
| AthPPR10      | -----                                                        | 691  |
| Toxoplasma    | EGDKNDPGCQTAGNDPGGETGLRRREGERDGVNEEAGGREKGASGQIEREREGEHDTEEA | 1399 |
| PVX_086110    | -----                                                        | 490  |
| PKH_134050    | -----                                                        | 521  |
| C922_03803    | -----                                                        | 495  |
| PCYB_135000   | -----                                                        | 512  |
| PRCDC_1405700 | -----                                                        | 487  |
| PF3D7_1406400 | -----                                                        | 488  |
| PFFV0_05018   | -----                                                        | 490  |
| PFIT_1407400  | -----                                                        | 490  |
| PFTANZ_05018  | -----                                                        | 489  |
| PCHAS_103660  | -----                                                        | 480  |
| PY17X_1038200 | -----                                                        | 487  |
| PY03222       | -----                                                        | 487  |
| PYYM_1037900  | -----                                                        | 487  |
| PBANKA_103580 | -----                                                        | 482  |

|               |                                                             |      |
|---------------|-------------------------------------------------------------|------|
| AthPPR10      | -----                                                       | 691  |
| Toxoplasma    | RERLEEKEEREKENSEREGRAIRAVSGERGLSVSAFLSSVLGPRRAVLESMPREPVLED | 1459 |
| PVX_086110    | -----                                                       | 490  |
| PKH_134050    | -----                                                       | 521  |
| C922_03803    | -----                                                       | 495  |
| PCYB_135000   | -----                                                       | 512  |
| PRCDC_1405700 | -----                                                       | 487  |
| PF3D7_1406400 | -----                                                       | 488  |
| PFFV0_05018   | -----                                                       | 490  |
| PFIT_1407400  | -----                                                       | 490  |
| PFTANZ_05018  | -----                                                       | 489  |
| PCHAS_103660  | -----                                                       | 480  |
| PY17X_1038200 | -----                                                       | 487  |
| PY03222       | -----                                                       | 487  |
| PYYM_1037900  | -----                                                       | 487  |
| PBANKA_103580 | -----                                                       | 482  |

|               |                                                              |      |
|---------------|--------------------------------------------------------------|------|
| AthPPR10      | -----                                                        | 691  |
| Toxoplasma    | TVTEEPESLELHADAEQAQLEAKQREGESRDRSGENTEASTERRNSPDREEEKQDPVTAT | 1519 |
| PVX_086110    | -----                                                        | 490  |
| PKH_134050    | -----                                                        | 521  |
| C922_03803    | -----                                                        | 495  |
| PCYB_135000   | -----                                                        | 512  |
| PRCDC_1405700 | -----                                                        | 487  |
| PF3D7_1406400 | -----                                                        | 488  |
| PFFV0_05018   | -----                                                        | 490  |
| PFIT_1407400  | -----                                                        | 490  |
| PFTANZ_05018  | -----                                                        | 489  |
| PCHAS_103660  | -----                                                        | 480  |
| PY17X_1038200 | -----                                                        | 487  |
| PY03222       | -----                                                        | 487  |
| PYYM_1037900  | -----                                                        | 487  |
| PBANKA_103580 | -----                                                        | 482  |

|               |                                                              |      |
|---------------|--------------------------------------------------------------|------|
| AthPPR10      | -----                                                        | 691  |
| Toxoplasma    | QETDANTGGTLSQAGGRKSEAAARSSESVETSLDLLLRKHKTPAETQQLEDGPPRWLARR | 1579 |
| PVX_086110    | -----                                                        | 490  |
| PKH_134050    | -----                                                        | 521  |
| C922_03803    | -----                                                        | 495  |
| PCYB_135000   | -----                                                        | 512  |
| PRCDC_1405700 | -----                                                        | 487  |
| PF3D7_1406400 | -----                                                        | 488  |
| PFFV0_05018   | -----                                                        | 490  |
| PFIT_1407400  | -----                                                        | 490  |
| PFTANZ_05018  | -----                                                        | 489  |
| PCHAS_103660  | -----                                                        | 480  |
| PY17X_1038200 | -----                                                        | 487  |
| PY03222       | -----                                                        | 487  |
| PYYM_1037900  | -----                                                        | 487  |
| PBANKA_103580 | -----                                                        | 482  |

|               |                                                                |      |
|---------------|----------------------------------------------------------------|------|
| AthPPR10      | -----                                                          | 691  |
| Toxoplasma    | SGTGEPGAEAVAGSRRGVHPPDGRAGVGIPIGGGAGSQRQRQETRGSQSAFLFAGDHGWGWP | 1639 |
| PVX_086110    | -----                                                          | 490  |
| PKH_134050    | -----                                                          | 521  |
| C922_03803    | -----                                                          | 495  |
| PCYB_135000   | -----                                                          | 512  |
| PRCDC_1405700 | -----                                                          | 487  |
| PF3D7_1406400 | -----                                                          | 488  |
| PFFVO_05018   | -----                                                          | 490  |
| PFIT_1407400  | -----                                                          | 490  |
| PFTANZ_05018  | -----                                                          | 489  |
| PCHAS_103660  | -----                                                          | 480  |
| PY17X_1038200 | -----                                                          | 487  |
| PY03222       | -----                                                          | 487  |
| PYYM_1037900  | -----                                                          | 487  |
| PBANKA_103580 | -----                                                          | 482  |

|               |                                         |      |
|---------------|-----------------------------------------|------|
| AthPPR10      | -----                                   | 691  |
| Toxoplasma    | PHWEEKLDKARARLQRTNDESGETEENAKTETPWGMRPT | 1678 |
| PVX_086110    | -----                                   | 490  |
| PKH_134050    | -----                                   | 521  |
| C922_03803    | -----                                   | 495  |
| PCYB_135000   | -----                                   | 512  |
| PRCDC_1405700 | -----                                   | 487  |
| PF3D7_1406400 | -----                                   | 488  |
| PFFVO_05018   | -----                                   | 490  |
| PFIT_1407400  | -----                                   | 490  |
| PFTANZ_05018  | -----                                   | 489  |
| PCHAS_103660  | -----                                   | 480  |
| PY17X_1038200 | -----                                   | 487  |
| PY03222       | -----                                   | 487  |
| PYYM_1037900  | -----                                   | 487  |
| PBANKA_103580 | -----                                   | 482  |

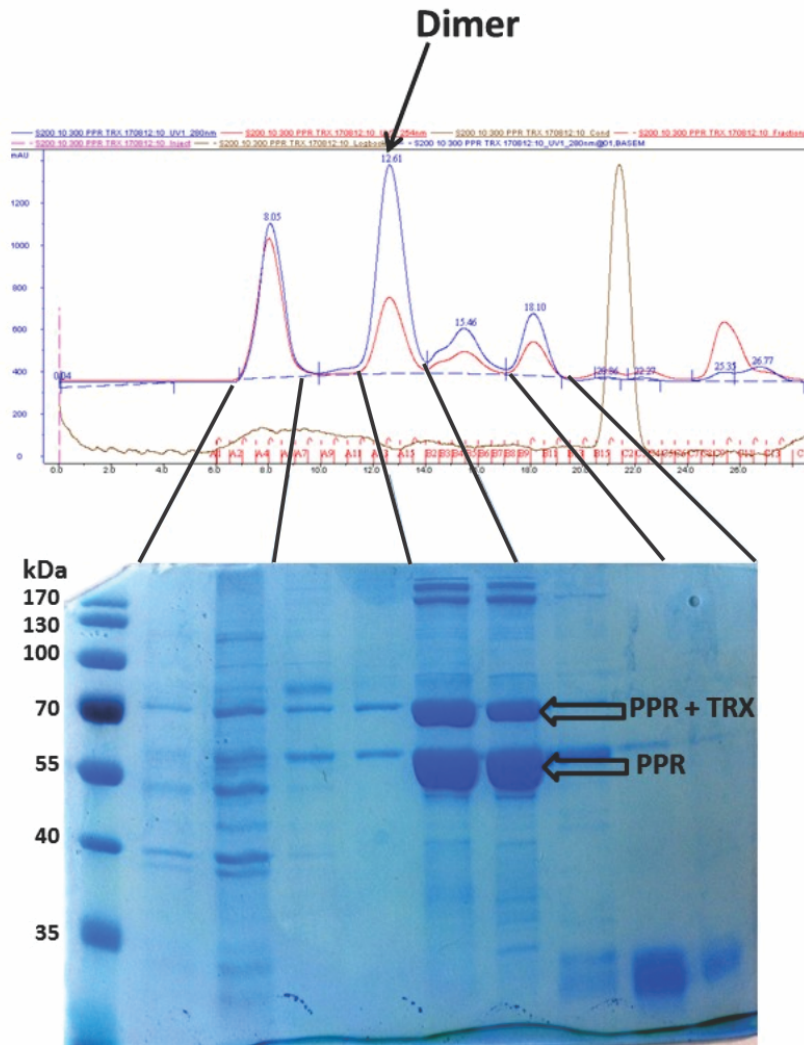

**Supplemental Figure S3. Gel filtration chromatography of His<sub>6</sub>-TRX-PfPPR1 and corresponding SDS-PAGE gel.** Blue line represents absorbance at 280 nm, red line absorbance at 260 nm and brown line conductivity. The trace for absorbance at 280 nm (blue line) shows four major peaks eluted from the S200 10/300 column. Based on calibration of the S200 10/300 column, the second peak corresponds to a molecular weight of approximately 135 kDa, and the estimated molecular weight of the His<sub>6</sub>-TRX-PfPPR1 dimer is 141.6 kDa. Spontaneous cleavage of the TRX-His tag is observed in the second peak, corresponding to PPR protein without the His<sub>6</sub>-TRX tag (estimated molecular weight of 56.8 kDa) with a smaller amount in the third peak. The fourth peak corresponds to the His<sub>6</sub>-TRX tag only (14 kDa).



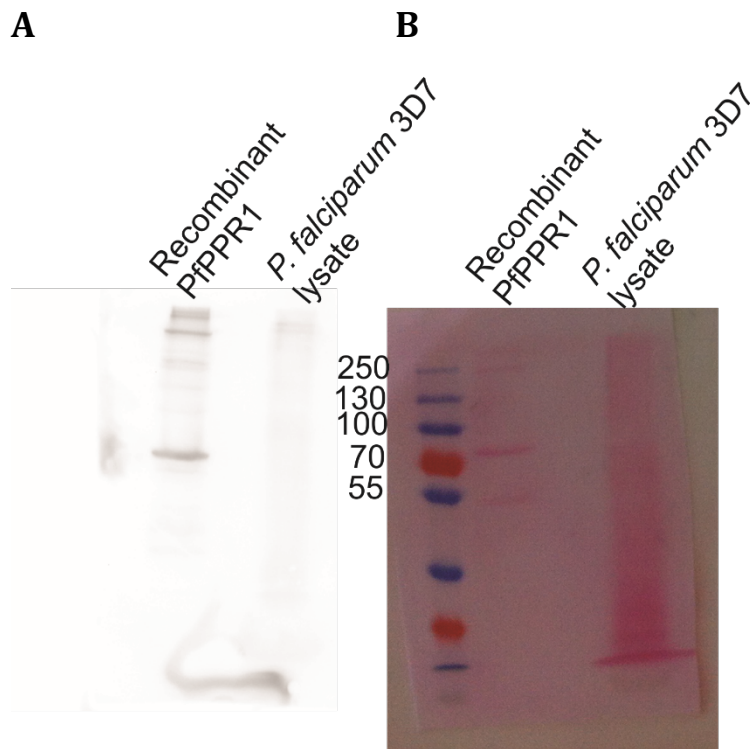

**Supplemental Figure S4. Western blot of purified *PfPPR1* protein and *P. falciparum* 3D7 lysate using the purified polyclonal anti-*PfPPR1* antibody.** Purified PfPPR1 protein was run on 10% SDS-PAGE gel along with *P. falciparum* 3D7 cell lysate. After incubation with the purified *PfPPR1* polyclonal rabbit antibody and a secondary goat anti-rabbit antibody conjugated to HRP, no *PfPPR1* protein could be detected in the *P. falciparum* 3D7 lysate (Panel A).. The positive control (recombinant *PfPPR1*) shows a band of the correct size (*PfPPR1* + TRX His<sub>6</sub> ~ 72.8 kDa) . The ponceau stained gel (Panel B) shows good transfer of proteins of all molecular weights. Size markers are shown in kDa.

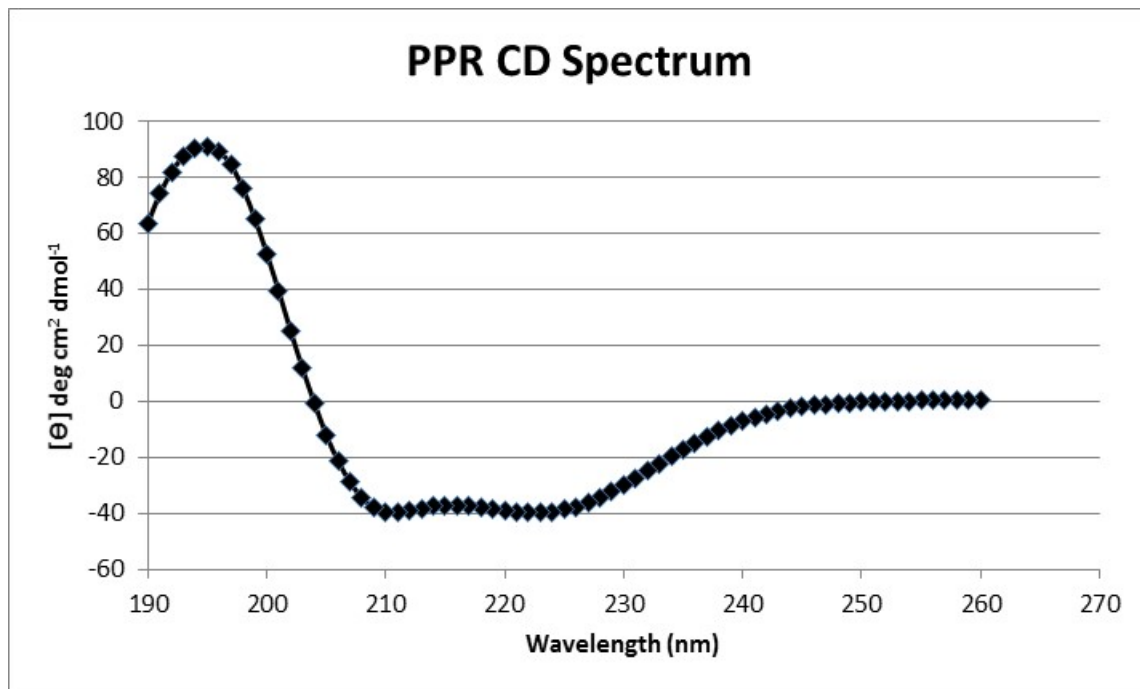

**Supplemental Figure S5. Circular Dichroism (CD) spectrum of purified *Pf*PPR1.**

*Pf*PPR1 minus His-TRX tag at 25°C in 10 mM potassium phosphate pH 8.0, 50 mM Na fluoride. Spectrum is typical of that for an alpha-helical protein.

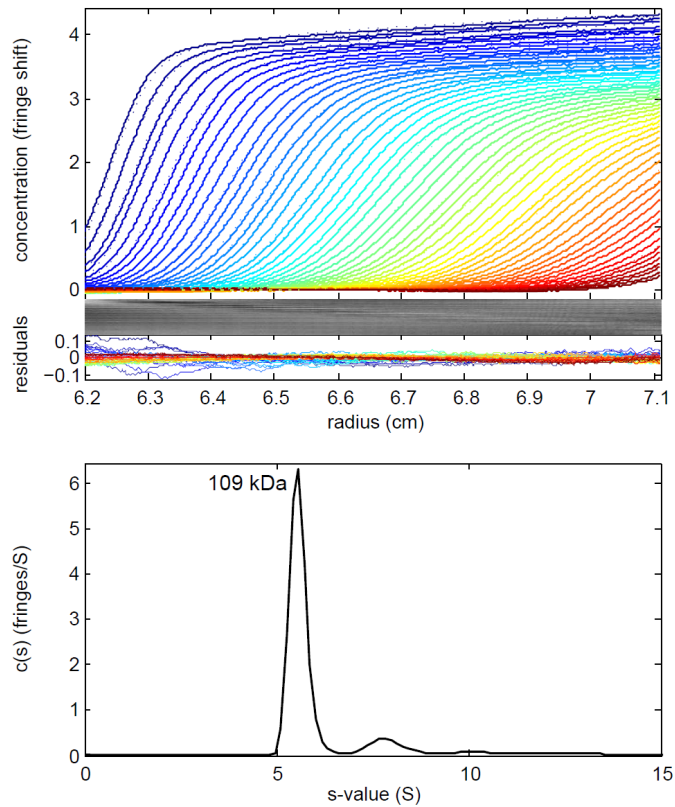

**Supplemental Figure S6. Analytical ultracentrifugation (AUC) sedimentation velocity data for *Pf*PPR1 minus His<sub>6</sub>-TRX tag.** The residuals are from the fit with the continuous  $c(s)$  distribution model. Component sedimentation coefficient distribution for PPR at 1.8 mg/mL showing populations of dimeric (fitted mass of 109 kDa) and higher-order species, fitting to a uniform frictional ratio of  $F_{k,w} = 1.378$ . The r.m.s.d. was 0.016.

**Supplementary Figure S7.** SWISS-MODEL analysis of PPR1 from both *Toxoplasma* and *Plasmodium*.

*Plasmodium*

| Model #01                                                                         | File | Built with             | Oligo-State | Ligands | GMQE | QMEAN |
|-----------------------------------------------------------------------------------|------|------------------------|-------------|---------|------|-------|
|  | PDB  | ProMod3 Version 1.3.0. | monomer     | None    | 0.39 | -4.61 |

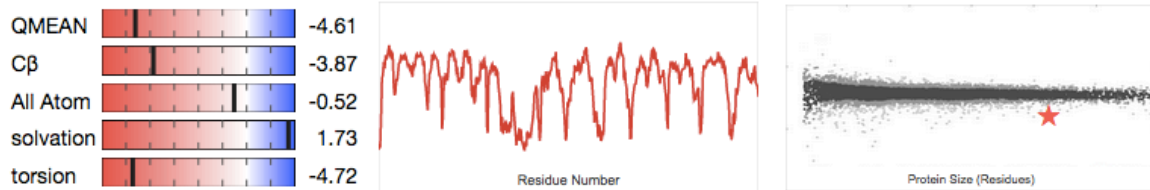

| Template | Seq Identity | Oligo-state | Found by | Method | Resolution | Seq Similarity | Range     | Coverage | Description                               |
|----------|--------------|-------------|----------|--------|------------|----------------|-----------|----------|-------------------------------------------|
| 5i9f.1.A | 20.00        | monomer     | HHblits  | X-ray  | 2.19Å      | 0.31           | 160 - 584 | 0.63     | pentatricopeptide repeat protein dPPR-U10 |

The template contained no ligands.

*Toxoplasma*

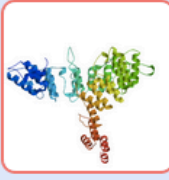

Model 02 ▾

**Structure Assessment**

Oligo-State ⓘ  
Monomer (matching prediction)

Ligands ⓘ  
None

GMQE ⓘ  
0.09

QMEAN ⓘ  
-6.41 ⓘ

**Global Quality Estimate**

QMEAN  -6.41

Cβ  -4.94

All Atom  -3.11

solvation  -1.00

torsion  -5.00

**Local Quality Estimate**



**Comparison**



| Template | Seq Identity | Coverage                                                                            | Description                                     |
|----------|--------------|-------------------------------------------------------------------------------------|-------------------------------------------------|
| 4m59.1.A | 14.26%       |  | Chloroplast pentatricopeptide repeat protein 10 |

| Biounit Oligo State | QSQE | Method        | Seq Similarity | Range     | Coverage |
|---------------------|------|---------------|----------------|-----------|----------|
| homo-dimer          | 0.00 | X-ray, 2.46 Å | 0.28           | 312 - 842 | 0.28     |

**Supplemental Figure S8. *Pf*PPR1 – RNA pull down assays.** (A) Five 150 nt RNA molecules (RNAs 1- 5, sequences as shown in Figure 3) and apicoplast RNA transcripts (*LSU rRNA – rpoB* and *tufA – clpC*) were used in a pull-down experiment. Biotinylated RNA was bound to streptavidin beads and used as ‘bait’ to pull down *Pf*PPR1 protein (with the TRX-His<sub>6</sub> tag removed). Bound *Pf*PPR1 was protein detected using a purified polyclonal anti-*Pf*PPR1 antibody from rabbit. Loading controls (PPR1 only) and a no RNA control reaction showed no non-specific binding in the absence of RNA. (B) The same pull down experiment using RNA oligonucleotides 1 – 3. The same result was obtained when the experiment was repeated (E). Details of RNA sequences are given in the legend to Figure 3, and specific sequences are shown (C and D).

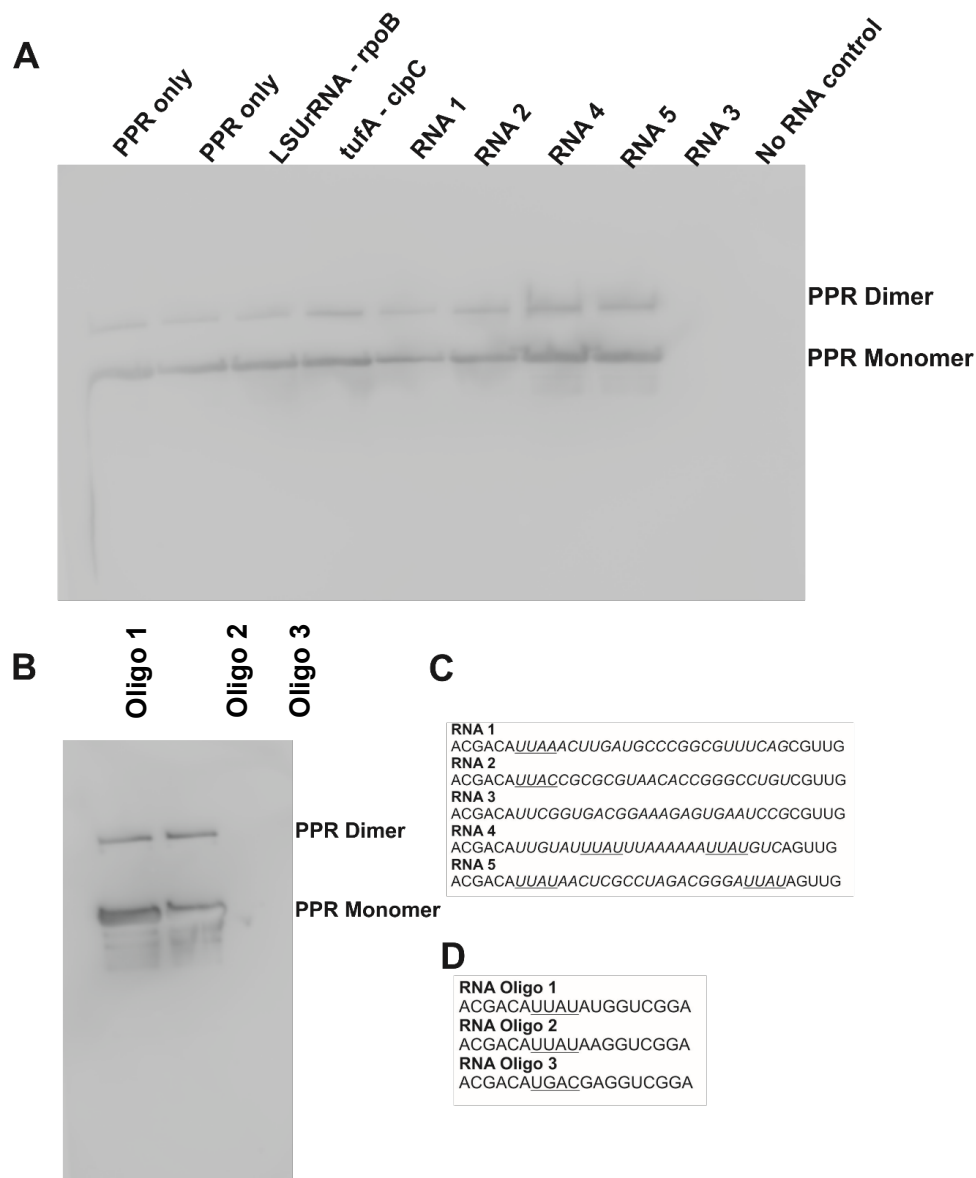

**E**

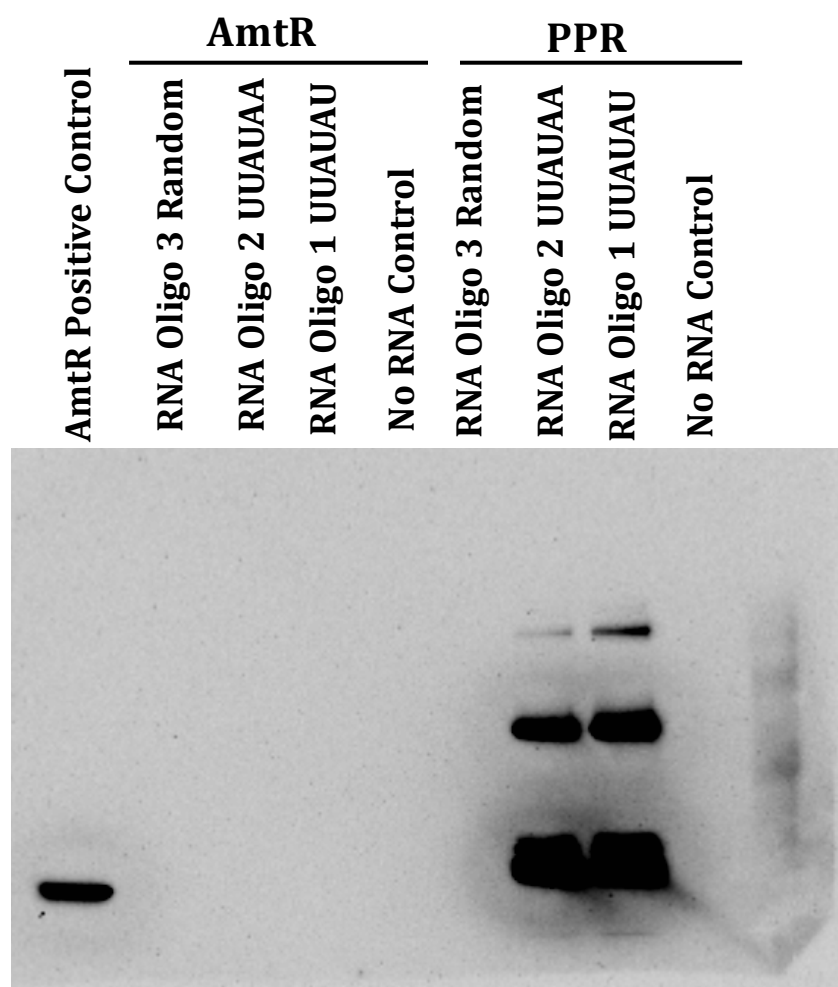

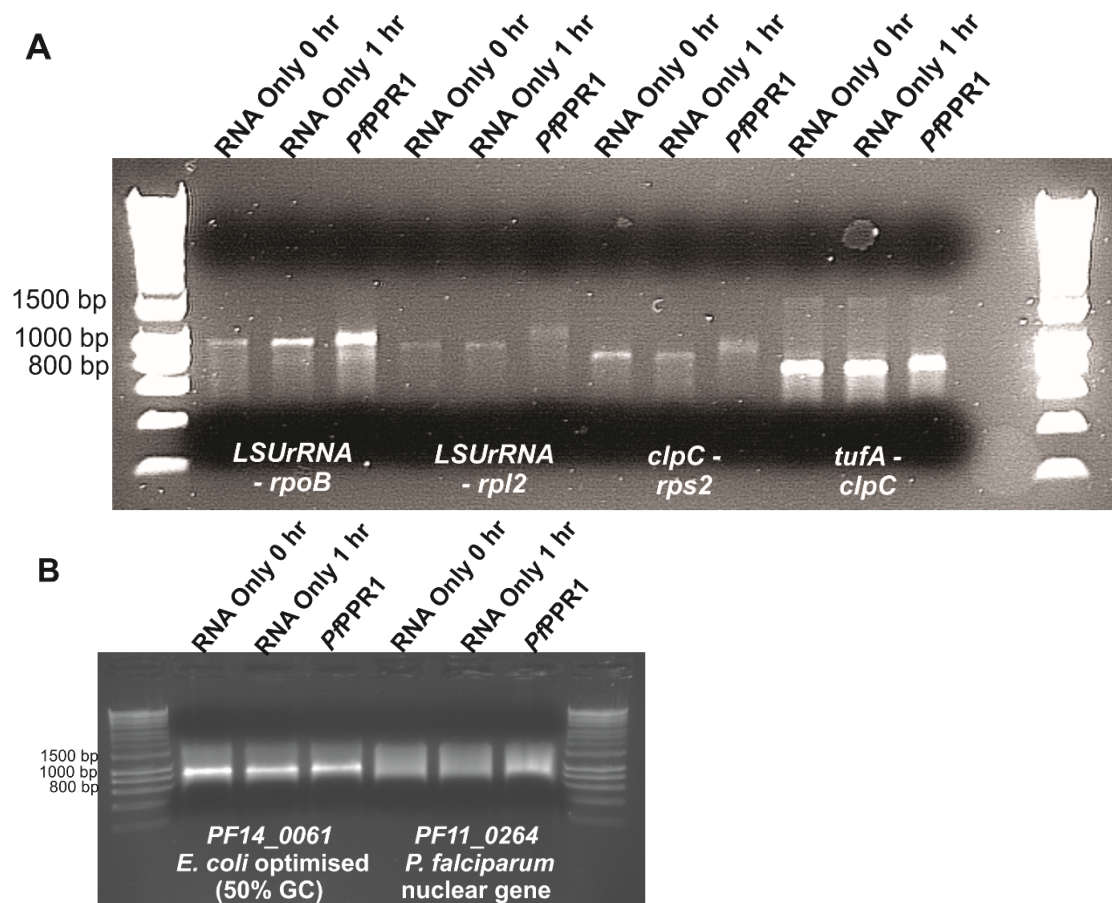

**Supplemental Figure S9. *Pf*PPR1 shows specific binding to apicoplast RNA transcripts.**

*Pf*PPR1 binding to apicoplast RNA transcripts was tested in a gel shift experiment.

Recombinant *Pf*PPR1 (minus TRX-His<sub>6</sub>) causes a shift in the migration of *in vitro* transcribed apicoplast RNA molecules following incubation for one hour (Panel A). No shift is seen in the RNA if it is not bound to PPR1. Panel B shows that no shift is seen when PPR1 is incubated with *in vitro* transcribed RNA from a nuclear encoded *P. falciparum* gene (PF11\_0264, or from an *E. coli* codon-optimized *P. falciparum* gene (PF14\_0061) and a *P. falciparum* 3D7 nuclear gene (PF11\_0264).

**Supplemental Figure S10 Gel filtration shows a change in elution profile when *Pf*PPR1 is bound to RNA.** This is a repeat of the data shown in Figure 4, showing that the change in mobility following gel filtration is reproducible.

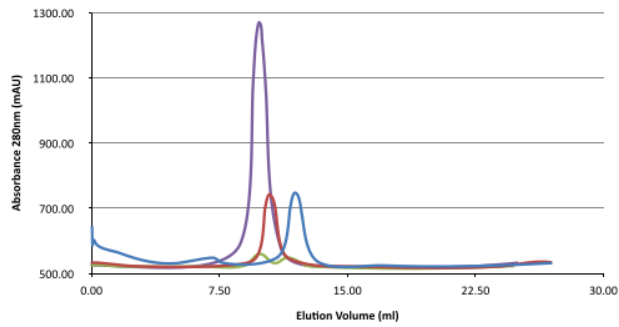

Expected Elution Volumes:  
 PPR TRX His<sub>6</sub> (143600 Da)  
 = 13.37 ml  
 RNA only (150 bases) 48750 Da  
 PPR + RNA  
 = 143600 Da + 48750 Da  
 = 192493.6 Da  
 = 12.76 ml

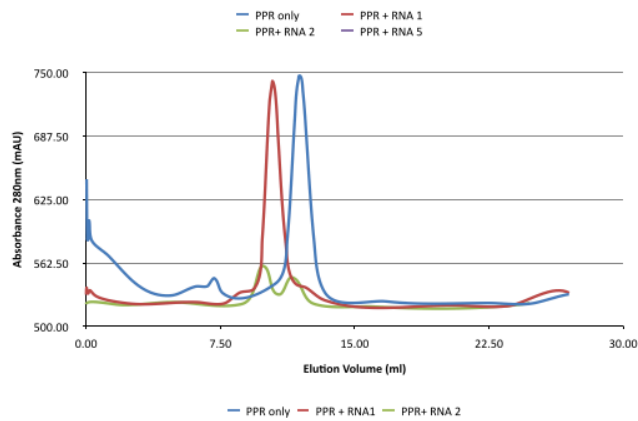

PPR (No RNA)  $V_e = 11.93$  ml

RNA 1 = 10.42ml  
 ACGACAUUAAACUUGAUGCCCGCGUUUCAGCGUUG

RNA2 = 9.87 & 11.50 ml  
 ACGACAUUACCGGUAUACCGGGCCUGUCCGUUG

RNA5 = 9.81 ml  
 ACGACAUUAUAACUCGCCUAGACGGGAUUAUAGUUG



**Supplemental Figure 11. Ribonuclease A protection assays.** RNA transcripts 1, 4 and 5 and RNA oligos 1,2 and 3 were incubated in a 1:1 molar ratio with *Pf*PPR1 prior to treatment with RNase A. Samples were analyzed using a native acrylamide gel (ladder in nt). Experiments with no *Pf*PPR1 bound to RNA showed complete degradation by RNase A

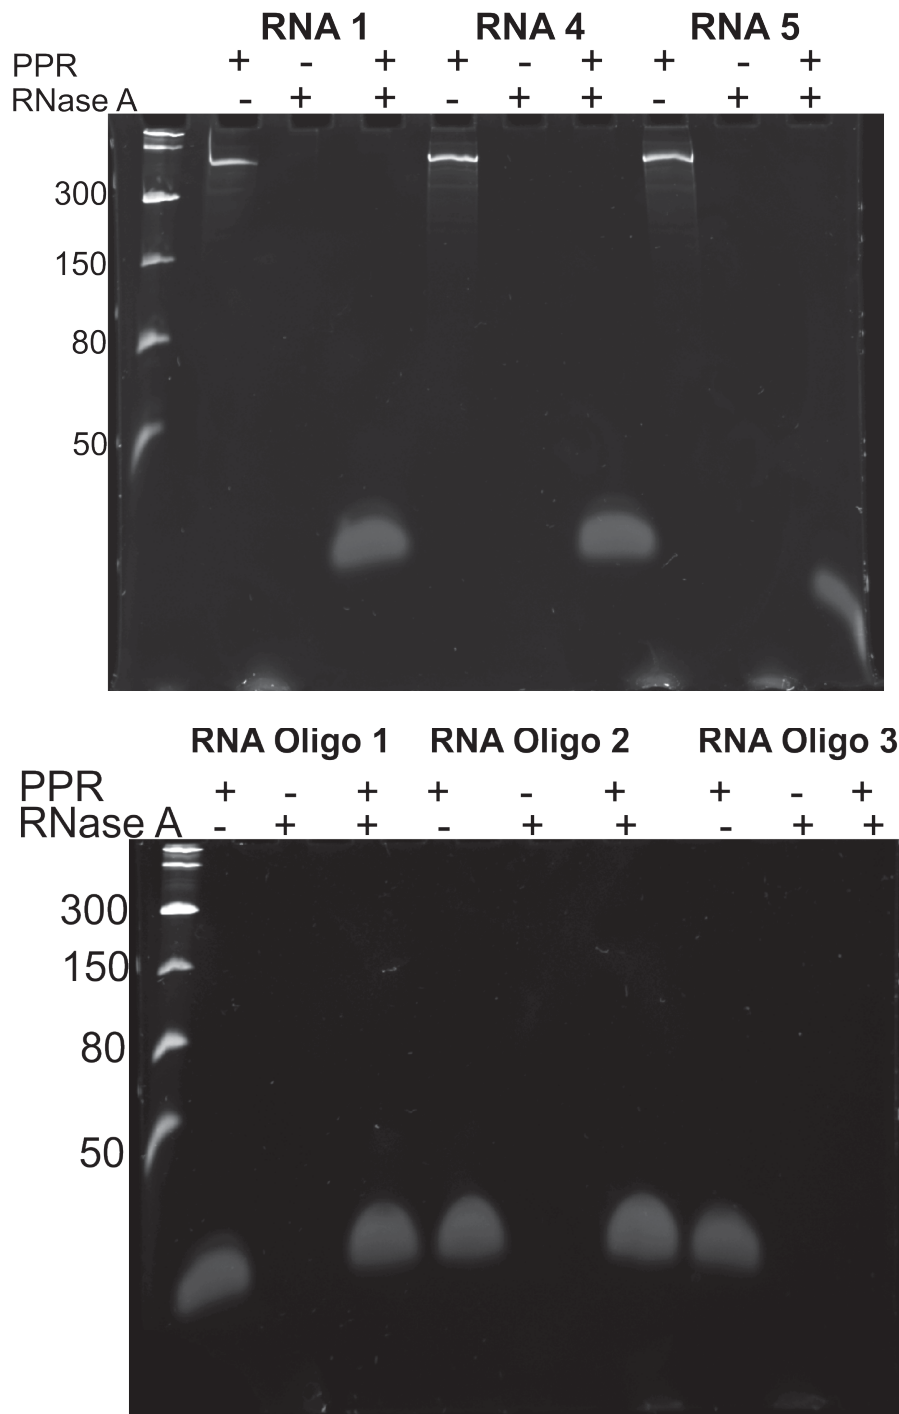

## Plasmid sequences used for *T. gondii* transformation.

### pCRISPR/Cas9-GFP\_PPR-sgRNA

392-1148 *SAG1* Promoter  
1149-5022 *Cas9-GFP* coding sequence  
6178-6490 *SAG1* Terminator  
6508-7053 *U6* Promoter  
7054-7170 *sgRNA* (7060-7079 *PPR* protospacer)  
7420-8087 *Col E1* origin  
8235-9095 *AMP*

```
1 ctaaattgta agcgtaata ttttgtaaa attcgcgta aatTTTTgtt aatcagctc
61 atTTTTaac caataggccg aaatcggcaa aatcccttat aatcaaaag aatagaccga
121 gatagggttg agtggccgct acagggcgct cccattcgcc attcaggctg cgcaactggt
181 gggaaagggcg tttcgggtgcg ggcctcttcg ctattacgcc agctggcgaa agggggatgt
241 gctgcaaggc gattaagttg ggtaacgcca gggTTTTccc agtcacgacg ttgtaaaacg
301 acggccagtg agcgcgacgt aatacgactc actatagggc gaattggcgg aaggccgtca
361 aggcctaggc gcgccaggtc tcatgccgga gaagctTTta catccgttgc cTTTTccacg
421 gtccgtgatt tcatgtgctg gcagcttcaa agactggtcg ttgcgactaa taagactgca
481 gtgacaggtc gaatggtggg caccttgctg atgactatct actgcaaagt ctgagacaac
541 gaacgaaact tcccacacga ggcatttgaa actgacggtg tctaggtaat atgactgca
601 agacacggta ctggggcctc gctgaattag gggccgatct cgttgcccta tcagtgetca
661 cagtgccgca acgtaacacc agggcaggtt cttgacagtg gcaacaatgt gcgacgggcg
721 tgtgaacggt tcgtagtcat agcgtagca cgtacctagc cacatggtcg tgaggagctt
781 taccatgctg ctagaaggtg gatgcgggac acgccttctt ggcTTTTggc tcccagacg
841 cgtgTtctaa ccacaaacct tgagacgctg gttccaacca cgcacctga cacgctggt
901 ccaaccacgc accctgagac gcgtgTtcta accacgcacc ctgagacgcy tgttctaacc
961 acgcacctg agacgctgt tctgccgcac aatgtgcacc tgtaggaagc tgtagtact
1021 gctgattctc actgTtctcg gcaaggccg acgaccggag tacagTTTT gtgggcagag
1081 ccgTtTgca gcttTccgtt cttctcggtt gtgtcacatg tgcattgtc gtgtaaacac
1141 acggtTgtat gtcggtTtctg ctgcaccact tcattattt tctggtTTTT ttgacgagta
1201 tgcatctaga caaaatggac aagaagtaca gcatcggcct ggacatcggc accaactctg
1261 tgggctgggc cgtgatcacc gacgagtaca aggtgcccag caagaaattc aaggtgctgg
1321 gcaacaccga ccggcacagc atcaagaaga acctgatcgg cgccctgctg ttcgacagcg
1381 gagaacacagc cgaggccacc cggctgaaga gaaccgccag aagaagatac accagacgga
1441 agaaccgat ctgctatctg caagagatct tcagcaacga gatggccaag gtggacgaca
1501 gcttcttcca cagactggaa gactccttcc tggTggaaga ggataagaag cacgagcggc
1561 acccatctt cggcaacatc gtggacgagc tggcctacca cgagaagtac cccaccatct
1621 accacctgag aaagaaactg gtggacagca ccgacaaggc cgacctgcyg ctgatctatc
1681 tggccctggc ccacatgatc aagTtccggg gccacttctt gatcgagggc gacctgaacc
1741 ccgacaacag cgacgtggac aagctgTtca tccagctggt gcagacctac aaccagctgt
1801 tcgaggaaaa ccccatcaac gccagcggcg tggacgcaa ggccatcctg tctgccagac
1861 tgagcaagag cagacggctg gaaaatctga tcgcccagct gcccggcgag aagaagaatg
1921 gcctgTtctg caacctgatt gccctgagcc tgggctgac cccaacttc aagagcaact
1981 tcgacctggc cgaggatgcc aaactgcagc tgagcaagga cacctacgac gacgacctgg
2041 acaacctgct ggcccagatc ggcgaccagt acgccgacct gTtctggcc gccaagaacc
2101 tgtccgacgc catcctgctg agcgacatcc tgagagtga caccgagatc accaaggccc
2161 cctgacgcgc ctctatgatc aagagatacy acgagcaca ccaggacctg acctgctga
2221 aagctctcgt gcggcagcag ctgcctgaga agtacaaga gatttcttc caccagagca
2281 agaacggcta cgccggctac atcgatggcg gagccagcca ggaagagTt tacaagTtca
2341 tcaagcccat cctggaaaag atggacggca ccgaggaact gctcgtgaag ctgaacagag
2401 aggacctgct gcggaagcag cggaccttcy acaacggcag catccccac cagatccacc
2461 tgggagagct gcacgccatt ctgcggcggc aggaagattt ttaccattc ctgaaggaca
2521 accgggaaaa gatcgagaag atcctgacct tccgatccc ctactacgtg ggccctctgg
2581 ccaggggaaa cagcagattc gcctggatga ccagaaagag cgaggaacc atccccct
2641 ggaacttca ggaagtggTg gacaagggcg ccagcgccta gagcttcatc gagcggatga
```

2701 ccaacttoga taagaacctg cccaacgaga aggtgctgcc caagcacagc ctgctgtacg  
2761 agtacttcac cgtgtacaac gagctgacca aagtgaataa cgtgaccgag ggaatgagaa  
2821 agccccctt cctgagcggc gagcagaaaa aagccatcgt ggacctgctg ttcaagacca  
2881 accggaaagt gaccgtgaag cagctgaaag aggactactt caagaaaatc gagtgtctcg  
2941 actccgtgga aatctccggc gtggaagatc ggttcaacgc ctccctgggc acataccacg  
3001 atctgctgaa aattatcaag gacaaggact tcttggaaca tgaggaaaac gaggacattc  
3061 tggaaagatat cgtgctgacc ctgacactgt ttgaggacag agagatgatc gaggaacggc  
3121 tgaaaacctg tgcccacctg ttcgacgaca aagtgatgaa gcagctgaag cggcggagat  
3181 acaccggctg gggcaggctg agccggaagc tgatcaacgg catccgggac aagcagtcg  
3241 gcaagacaat cctggatttc ctgaaagtccg acggcttcgc caacagaaac ttcattcgagc  
3301 tgatccacga cgacagcctg acctttaaag aggacatcca gaaagccag gtgtccggcc  
3361 agggcgatag cctgcacgag cacattgcca atctggccgg cagccccgcc attaagaagg  
3421 gcatcctgca gacagtgaag gtggtggacg agctcgtgaa agtgatgggc cggcacaagc  
3481 ccgagaacat cgtgatcgaa atggccagag agaaccagac caccagaag ggacagaaga  
3541 acagccgcga gagaatgaag cggatcgaa agggcatcaa agagctgggc agccagatcc  
3601 tgaaagaaca ccccgaggaa aacaccagc tgcaagaacga gaagctgtac ctgtactacc  
3661 tgcagaatgg gcgggatatg tacgtggacc aggaaactgga catcaaccgg ctgtccgact  
3721 acgatgtgga ccatatcgtg cctcagagct ttctgaagga cgactccatc gataacaaag  
3781 tgctgactcg gagcgacaag aaccggggca agagcgacaa cgtgccctcc gaagaggctg  
3841 tgaagaagat gaagaactac tggcgccagc tgctgaaatgc caagctgatt acccagagga  
3901 agttcgacaa tctgaccaag gccgagagag gcggcctgag cgaactggat aagggcggct  
3961 tcatcaagag acagctggtg gaaaccggc agatcacaaa gcactggga cagatcctgg  
4021 actcccgat gaacactaag tacgacgaga acgacaaaact gatccgggaa gtgaaagtga  
4081 tcaccctgaa gtccaagctg gtgtccgatt tccggaagga tttccagttt tacaagtgc  
4141 gcgagatcaa caactaccac cacgcccacg acgctactct gaacgccgtc gtgggaaccg  
4201 ccctgatcaa aaagtaccct aagctgaaa gcgagttcgt gtacggcgac tacaaggtgt  
4261 acgacgtgag gaagatgatc gccaaagagc agcaggaaat cggcaaggct accgccaagt  
4321 acttcttcta cagcaacatc atgaactttt tcaagaccga gattaccctg gccaacggcg  
4381 agatccggaa gcggcctctg atcgagacaa acggcgaaaac aggcgagatc gtgtgggata  
4441 agggccggga ctttgccacc gtgcccgaag tgctgtctat gccccaagtg aatatcgtga  
4501 aaaagaccga ggtgcagaca ggcggcttca gcaaaagatc tatcctgccc aagaggaaca  
4561 gcgacaagct gatcgccaga aagaaggact gggaccctaa gaagtacggc ggcttcgaca  
4621 gccccaccgt ggcctattct gtgctggtg ttggccaaagt ggaaaagggc aagtccaaga  
4681 aactgaagag tgtgaaagag ctgctgggga tcaccatcat ggaagaagc agctcgaga  
4741 agaatcccat cgactttctg gaagccaagg gctacaaaaga agtgaaaaag acctgatca  
4801 tcaagctgcc taagtactcc ctgttcgagc tggaaaacgg ccggaagaga atgctggcct  
4861 ctgccggcga actgcagaag ggaaacgaac tggccctgcc ctccaaatat gtgaacttcc  
4921 tgtacctggc cagccactat gagaagctga agggctcccc cgaggataat gagcagaaac  
4981 agctgtttgt ggaacagcac aaactactacc tggacgagat catcgagcag atcagcgagt  
5041 tctccaagag agtgatcctg gccgacgcta atctggacaa ggtgctgagc gcctacaaca  
5101 agcacagaga caagcctatc agagagcagc ccgagaatat catccacctg tttaccctga  
5161 ccaatctggg agccccctgc gccttcaagt actttgacac caccatcgac cggaaagggt  
5221 acaccagcac caaagagggt ctggacgcca ccctgatcca ccagagcatc accggcctgt  
5281 acgagacacg gatcgacctg tctcagctgg gaggcgacgc ctatccctat gacgtgcccg  
5341 attatgccag cctgggcagc ggctccccca agaaaaaacg caaggtggaa gatcctaaga  
5401 aaaagcggaa agtggacggc attggtagt ggagcaacgg cagcagcga tccgtgagca  
5461 agggcgagga gctgttcacc ggggtggtgc ccatcctggt cgagctggac ggcgacgtaa  
5521 acggccacaa gttcagcgtg cgcggcgagg gcgagggcga tgccaccaac ggcaagtga  
5581 ccctgaagtt catctgcacc accggcaagc tgcccctgcc ctggcccacc ctctgacca  
5641 ccctgacctg cggcgtgcag tgcttcagcc gctacccccg ccacatgaag cagcacgact  
5701 tcttcaagtc cgccatgccc gaaggctacg tccaggagcg caccatctcc ttcaaggacg  
5761 acggcaccta caagaccgc gccgaggtga agttcgaggg cgacaccctg gtgaaccgca  
5821 tcgagctgaa gggcatcgac ttcaaggagg acggcaacat cctggggcac aagctggagt  
5881 acaacttcaa cagccacaac gtctatatca cggccgacaa gcagaagaac ggcatcaagg  
5941 cgaacttcaa gatccgccac aacgtcgagg acggcagcgt gcagctcgcc gaccactacc  
6001 agcagaacac ccccatcggc gacggccccg tgctgctgcc cgacaaccac tacctgagca  
6061 cccagtccaa gctgagcaaa gaccccaacg agaagcgcga tcacatggtc ctgtggagt  
6121 tctgtaccgc cgcgggatc actctcggca tggacgagct gtacaagtag ttaattaatc  
6181 accgttgtgc tcacttctca aatcgacaaa ggaaacacac ttcgtgcagc atgtgcccc  
6241 ttataaagaa actgagttgt tccgctgtgg cttgcagggtg tcacatccac aaaaaccggc  
6301 cgactctaaa taggagtgt tccgagcaag cagcgaaggt ttatgactgg gtccgaatct  
6361 ctgaacggat gtgtggcgga cctggctgat gttgatcgcc gtcgacacac gcgccacatg  
6421 ggtcaataca caagacagct atcagttgtt ttagtcgaac cggttaacac aattcttgcc

6481 cccccgaggg cgctgcaagg agtctcagga gcaagtaagc agaagcacgc tgtatttccg  
6541 ggaggggtgcg atgagacaaa gtgctcgagt tgaaatcgtc gtggggacga tttcaccgcg  
6601 gccacatggt ggagacactg agggcacacg gaaacgcga aagatttcaa ataacgtac  
6661 ccaaacgcga aagcttgccg agcatacact cgaagcgaac atcccgaacc atcgagaggc  
6721 ggagagcgat aagtctttca cgctgcgaag tgttgccgac gctgcgccg tgcactgtga  
6781 attgggctgca aatattgcat cctaggcctg acgcgcctcc tgcagaacgc gagacactgg  
6841 gatatgtaga gccaaagggg aaaccttcca actctcgaat gtattctctg acaagaatca  
6901 tatttccatc agttctgtca gattttcaaa tggcgacctg cagaggcctg cttcctccct  
6961 gtgcgctcct cgaaggggct ttctgtccg cagggtcacc tcgtcccga agggggtggt  
7021 tgccttctgg taaatgggga tgtcaagtta gttgagttgt tgagcgagag acagctcagg  
7081 ttttagagct agaaatagca agttaaata aggctagtcc gttatcaact tgaaaaagt  
7141 gcaccgagtc ggtgcttttt tgagctccag cttttgttcc ctttagtgag ggtaattgc  
7201 gcgcttgccg tcgctactag aggatgcaca tgtgaccgag ggaattaatt aactggcctc  
7261 atgggccttc cgctcactgc ccgctttcca gtcgggaaac ctgtcgtgcc agctgcatta  
7321 acatggatcat agctgtttcc ttgcgtattg ggcgctctcc gcttctcgc tcaactgactc  
7381 gctgcgctcg gtcgttcggg taaagcctgg ggtgcctaat gagcaaaagg ccagcaaaag  
7441 gccaggaacc gtaaaaaggc cgcggtgctg gcgtttttcc ataggctccg cccccctgac  
7501 gagcatcaca aaaatcgacg ctcaagtacg aggtggcgaa acccgacagg actataaaga  
7561 taccaggcgt ttccccctgg aagctccctc gtgcgctctc ctgttccgac cctgccgctt  
7621 accgataacc tgtccgcctt tctcccttcg ggaagcgtgg cgctttctca tagctcacgc  
7681 ttaggtatc tcagttcggg gtaggtcgtt cgctccaagc tgggctgtgt gcacgaccc  
7741 cccgctcagc ccgaccgctg cgccttatcc gtaactatc gtcttgatc caaccggta  
7801 agacacgact tatcgccact ggcagcagcc actggtaaca ggattagcag agcgaggtat  
7861 gtaggcggtg ctacagagtt cttgaagtgg tggcctaact acggctacac tagaagaaca  
7921 gtatttggtg tctgcgctct gctgaagcca gttaccttcg gaaaaagagt tggtagctct  
7981 tgatccggca aacaaaccac cgctggtagc ggtggttttt ttgtttgcaa gcagcagatt  
8041 acgcgcagaa aaaaggatc tcaagaagat cttttgatct tttctacggg gtctgacgct  
8101 cagtggaacg aaaactcacg ttaagggatt ttggtcatga gattatcaaa aaggatcttc  
8161 acctagatcc ttttaaatta aaaatgaagt tttaaatcaa tctaaagtat atagtagtaa  
8221 acttgggtctg acagttacca atgcttaatc agtgaggcac ctatctcagc gatctgtcta  
8281 tttcgttcat ccatagttgc ctgactcccc gtcgtgtaga taactacgat acgggagggc  
8341 ttaccatctg gccccagtgc tgcaatgata ccgcgagaac cacgctcacc ggetccagat  
8401 ttatcagcaa taaaccagcc agccggaagg gccgagcga gaagtggctc tgcaacttta  
8461 tccgctcca tccagtctat taattgttgc cgggaagcta gagtaagtag ttcgccagtt  
8521 aatagtttgc gcaacgttgt tgccattgct acaggcatcg tgggtgcacg ctctcgtttt  
8581 ggtatggctt cattcagctc cggttcccaa cgatcaaggc gagttacatg atccccatg  
8641 ttgtgcaaaa aagcggttag ctccctcggg cctccgatcg ttgtcagaag taagttggcc  
8701 gcagtgttat cactcatggt tatggcagca ctgcataatt ctcttactgt catgccatcc  
8761 gtaagatgct tttctgtgac tgggtgagtac tcaaccaagt cattctgaga atagtgtatg  
8821 cggcgaccga gttgctcttg cccggcgtca atacgggata ataccgccc acatagcaga  
8881 actttaaaag tgctcatcat tggaaaacgt tcttcggggc gaaaactctc aaggatctta  
8941 ccgctgttga gatccagttc gatgtaacct actcgtgcac ccaactgatc ttcagcatct  
9001 tttactttca ccagcgtttc tgggtgagca aaaacaggaa ggcaaatgc cgcaaaaag  
9061 ggaataaggg cgacacggaa atgttgaata ctcatactct tcctttttca atattattga  
9121 agcatttatc agggttattg tctcatgagc ggatacatat ttgaatgtat ttagaaaaat  
9181 aaacaaatag gggttccgcg cacatttccc cgaaaagtgc cac

**pPPR-mCherry\_CAT**

388-1441 1054 bp of 3' PPR sequence

1442-2152 mCherry coding sequence

2157-2469 SAG1 terminator

2482-2935 GRA1 promoter

2937-3602 CAT (chloramphenicol acetyltransferase) coding sequence

3607-3919 SAG1 terminator

4128-4795 Col E1 origin

4943-5803 AMP

```
1 ctaaattgta agcgттаата ttttgttaaa attcgcgтта aatttttgтт ааатсagctc
61 attttttaac caataggccg aaatcggcaa aatcccttat ааатсaaaag аатagaccga
121 gatagggттg агtgгccgct acagggcgct cccattcgcc атtcaggctg cгcaactgтт
181 ggaagggcgg tttcggtgcg ggcctcttcg ctattacgcc агtcggcgaa агggggatgt
241 gctgcaaggc gattaagттg ggtaacgcca ggttttccc агtcacgacg ttgтаaaacg
301 acggccagtg агсгсgacgt ааатсgactc actatagggc gaattggcgg аaggccgtca
361 aggcctaggc гсгссaggtc tcatgcccga gggaatgcag ccgaagagat cggccgatcc
421 ggagggcgac аагаacgatc ctggttgтca аacagcagga аacgatcccc ggggagagac
481 агgactgaga сgacgagaag gagagagaga сggagtgaat gaagaagcgг gaggtagaga
541 gaaagggcga tcagggcaga tagaacgaga гсgagaagga gaacacgata cagaagaagc
601 ааgаgаgаgа сtcgaagaga аагаагаага gagagaaaag gagaacagtг аacgggaagg
661 gagagcaata агagcagттt сaggagagag агgattgтсg gtttctgтт tcttgagттc
721 сgtcctcggc ccgсгtсgсg сggtgcttgа gagcatgсгг gaagagccгг ttttgaggа
781 сacggtgacc gaggaacctg агagccttgа actgcatgca гacгсgааg сгсagctggа
841 ggcgaagcag агggaaггсg агagccгсgа сagaagcгgt gaaaacacag аagcctcaac
901 ggagaggaga аactcгссag accgagaага агagaaaсag gatcctgtca сgacggcaac
961 ccaggagaca gatgсgааса ctgggggaac гctgtcгсg агсgggaggaa gaaagagcga
1021 агсagcttсc агatccgaat сtgтсgаgас gagtctggat сttcttcttc gactcaagca
1081 сааgасгссg гсgаgаgасгс агсagctсgа агatggaccg сctcгсгtgгс tcgссaggсg
1141 ааgсггсса са ggggagccгг gagctgaggc сgtcгсcaggt агссгссггг gtgtacatcc
1201 acccgacggc сgggсгггgаg tcggaatccc tggaggaggc гсaggtctc агaggсagаg
1261 acaggagacg агagggсgага gtgcatttct сtttgсaggt gaccacggct ggggatggc
1321 gccgсactгg gaagaaaaac tcgacaaggc tcgagccaga ttgсagсgaa сgaacgacga
1381 ааgtggagaa accgaggaaa атgсаааgас агaaaсссct tgggggatгс gaccgacttc
1441 gatggtgagc аaggгсgаgг агgataacat ggccatcatc аaggagtтca tгсгсттсаа
1501 ggtgcacatg gagggctccg tgaacggcca сgagттсgаg атсgаggгсg агggгсgаggг
1561 сgccccctac gagggcaccс агaccgссаа gctgaaggтg ассаaggггt gccccctгсс
1621 сttcгсctгg gacatcctgt сссctсagтт сatgtacggc тссаaggсct асgtgaagca
1681 ссссгссgac атссссgact асттгаagтt гtccttcccc gaggгсттса агtgggagcг
1741 сgtgatgaac ttсgaggacg гсggсггггt gaccgtgacc сaggactcct ссctgсgаgа
1801 сggсgаgtтc атсtасаagg tgaagctгсg сggсacсаac тtсссctсгг асggсссгt
1861 аатгсgагааg аааacсatгг gctgggaggc сtсctссgаg сggatgtacc сgaggacгг
1921 сgссctgааg ggcgagatca агсagaggct gaagctgaag гacggсггсс actacgacгс
1981 tgaggтсааg accacctaca агgссаагаа gсссгtgсg сtgсссггсг сtасаacгt
2041 саасatсааg ttggacatca сctcccасаа сgaggactac ассatсгtgг аасagтacга
2101 асгсгссgаg ggcсгсссact ссaccггсгг сatggacgag сtgтасааgt гagcttatca
2161 сгgttgтgct сactttctcaа атсgасаааg gaaacacact тсgtгсgаgса tgtgссссat
2221 татааgагаа сtgagттgтт ссгctгtgгс ttгсaggtgt сасatсссаа аааacгггсс
2281 gactctaaat агgagтgтт сгсagсаагс агсgаааgtт татgactггг тссgаатсtс
2341 tgaacgatg тgtggсггac сtgгctgаt ttgatсгссг тсgасacасг атсcttgссс
2401 gtcaatacаc ааgасagтa тсagттgтт тagtсgаacc ggtтаacаса атсcttgссс
2461 ссссгггггс gctgсаaggа gatagctггг tactcгtсac gaatacсаat сгctggggгtс
2521 гсggсгггггgа gаататgctг tttgттgacc атасgатсac гctgaacgaa аасatggтat
2581 гagacгссгt аагсгггсac агgttgттг ссctсгtсtс атtgсггacc аатсссгgt
2641 ссaccгctгс gtctсgactc гacgгттgтg ассacсссac тtcгсattгг гсagтсггта
2701 ааgсссасас аttactттgс аатттатсг gttgааactг ссgагсgагс тtgсгттттt
```

2761 ggggtgctatc ttctcccacc ttttatcagt taagttgtac agtgagtgtc agcttgtttc  
2821 gacacgtctg tatagacgca actcggtttg cttgtgttgt ttgggtggctg gccaaatcaa  
2881 aggctattca tttttcactt gctggtgttc tttgaagaaa tcaagcaaga gtcaaaatgc  
2941 tgcattgagaa aaaaatcact ggatatacca ccggtgatat atcccaatcg catcgtaaag  
3001 aacatthttga ggcatttcag tcagttgctc aatgtaccta taaccagacc gttcagctgg  
3061 atattacggc ctttttaaa accgtaaaga aaaataagca caagttttat cgggccttta  
3121 ttcacattct tgcccgcctg atgaatgctc atccggaatt ccgtagggca atgaaagacg  
3181 gtgagctggt gatatgggat agtgttcacc cttgttacac cgttttccat gagcaaactg  
3241 aaacgthttc atcgcctctg agtgaatacc acgacgattt ccggcagttt ctacacatat  
3301 attcgcaaga tgtggcgtgt tacggtgaaa acctggccta tttccctaaa gggthttattg  
3361 agaatatgth tttcgtctca gccaatccct gggtagthtt caccagthtt gattthaaacg  
3421 tggccaatat ggacaacttc ttcgccccg ttttcacat gggcaaatat tatacgaag  
3481 ggcacaaggt gctgatgccg ctggcgattc aggttcatca tgccgtctgt gatggcttcc  
3541 atgtcggcag aatgcttaat gaattacaac agtactgcga tgagtggcag ggcggggctt  
3601 aagcttatca ccgthtgct cacttctcaa atcgacaaag gaaacacact tctgtcagca  
3661 tgtgccccat tataaagaaa ctgagthgth ccgctgtggc tgcagthgt cacatccaca  
3721 aaaaccggcc gactctaaat aggagthgth cgcagcaagc agcgaagth tatgactggg  
3781 tccgaatctc tgaacggatg tgtggcggac ctggctgatg ttgatcgccg tgcacacag  
3841 cgccacatgg gtcaatacac aagacagcta tcagthgth tagtcaacc ggttaacaca  
3901 attcttgccc ccccgagggc gctactagag gatgcacatg tgaccgaggg aattaattaa  
3961 ctggcctcat gggccttccg ctactgccc gctttccagt cgggaaacct gtcgtgccag  
4021 ctgcattaac atggctatag ctgthtctt gcgtattggg cgtctctccg tctctcgtc  
4081 actgactcgc tgcgctcggc cgttcgggta aagcctgggg tgcctaatga gcaaaaggcc  
4141 agcaaaaggc caggaaccgt aaaaaggccg cgttgctggc gthtttccat aggctccgcc  
4201 cccctgacga gcatacaaaa aatcgacgct caagtcagag gtggcgaaac ccgacaggac  
4261 tataaagata ccaggcgtth cccctgga gctccctcgt gcgctctcct gttccgacct  
4321 tgccgcttac cggatacctg tccgcttht tcccttccgg aagcgtggcg cthtctcata  
4381 gctcacgctg taggtatctc agthcgggtg aggtcgttcg ctccaagctg gctgtgtgc  
4441 acgaaccccc cgttcagccc gaccgctcgc cthtatccgg taactatcgt cthgagthca  
4501 acccggttag acacgactta tccgactgg cagcagccac tggtaacagg attagcagag  
4561 cgaggtatgt aggcgggtgt acagagthct tgaagthgt gcctaactac ggctacacta  
4621 gaagaacagth atthggtatc tgcgctctgc tgaagccagth taccttccga aaaagagthg  
4681 gtagctcttg atccggcaaa caaacaccg ctggtagcgg tggthtttt tthtgcaagc  
4741 agtgattac gcgcagaaaa aaagcatctc aagaagatcc tthgatctth tctacgggg  
4801 ctgacgctca gtggaacgaa aactcacgth aagggattht ggtcatgaga thatacaaaa  
4861 ggatcttcac ctgatctctt thaaatthaa aatgaagtht thaatcaat thaaagtatat  
4921 atgagthaac thggtctgac agthaccaat gctthaatcag thgagccact atctcagcga  
4981 tctgtctatt tctgtcatcc atagthgctt gactccccgt cgtgtagata actacgatac  
5041 gggagggctt accatctggc cccagthgct caatgatacc gcgagaacca cgtcaccgg  
5101 ctccagatth atcagcaata aaccagccag ccggaagggc cgagcgcaga agthgthctg  
5161 caactthtatc cgcctccatc cagthctatta atthgtgccc ggaagctaga gthagthgt  
5221 cgccagthaa tagthtgcgc aacgthgtht ccattgctac aggcathgct gthtcacgct  
5281 cgtcgtthtg tatggcttca thcagctccg gthcccaacg atcaaggcga gthacatgat  
5341 cccccatgth gtgcaaaaa gcggttagct ccttccgthc tccgatcgtt gthcagaagta  
5401 agthggccgc agthgthtca ctcatgtht thggcagcact gcataatct cthactgthca  
5461 tgccatccgt aagatgctth tctgtgactg thgagthact aaccaagthca thctgagaat  
5521 agthgatcgc gcgaccgagth tctctthgccc cggcgtcaat accggataat accgcgccac  
5581 atagcagaac ththaaagth ctcatcathg gaaaacgtht thcggggcga aaactctcaa  
5641 ggatcttacc gctgthgaga thcagthtca thgtaaccac thcgtgcccc aactgatctt  
5701 cagcatctth tactthcacc agcgtthctg gthgagcaaa aacaggaag caaaatgccg  
5761 caaaaaaggg aataagggcg acacggaaat gthgaaact catactctt cthtttcaat  
5821 attattgaag cathtatcag gthtattgth tcatgagcgg atacattht gaatgthtt  
5881 agaaaaataa acaaataggg gthtccgcgca cathtccccg aaaagthcca c

//
